# Supplementary material for: An Alternative Approach towards C-12 Functionalized Scalaranic Sesterterpenoids Synthesis of 17-Oxo-20-norscalaran-12α,19-O-lactone
Source: MDPI journal article supplement (doi:10.3390/md19110636), 2021-11-12
Supplement: s1 [file s1]

## SUPPLEMENTARY MATERIAL

### An alternative approach towards C-12 functionalized scalaranic sesterterpenoids. Synthesis of 17-oxo-20-norscalarane-12 $\alpha$ ,19-O-lactone

Olga Morarescu <sup>1</sup>, Marina Grinco <sup>1</sup>, Veaceslav Kulcički <sup>1</sup>, Sergiu Shova <sup>2,3</sup>, Nikon Ungur <sup>1,\*</sup>

<sup>1</sup> Institute of Chemistry, 3 Academiei Str., MD 2028 Chişinău, Moldova; olgamorarescu7@gmail.com> (O.M.); grinkom@yahoo.com, (M.G.); kulcitki@yahoo.com, (V.K.)

<sup>2</sup> Ningbo University of Technology, No. 201, Fenghua Road, Ningbo 315211, China;

<sup>3</sup> "Petru Poni" Institute of Macromolecular Chemistry, 41A Aleea Gr. Ghica Voda, 700487 Iasi, Romania; shova@icmpp.ro (S.S.)

#### Supplementary data includes:

|                                                     |      |
|-----------------------------------------------------|------|
| X-Ray crystal structure report for lactone <b>8</b> | SM 2 |
| NMR SPECTRA of compounds <b>6-11</b>                | SM8  |
| Reference                                           | SM26 |

#### Corresponding author:

Prof. Ungur Nikon  
Institute of Chemistry  
3, Academiei str., Chişinău, MD-2028,  
Republic of Moldova  
nicon.ungur@gmail.com

## X-RAY CRYSTAL STRUCTURE REPORT

### Lactone 8 (5187)

#### EXPERIMENTAL

X-ray diffraction measurements were carried out with a Rigaku Oxford-Diffraction XCALIBUR E CCD diffractometer equipped with graphite-monochromated MoK $\alpha$  radiation. Single crystal was positioned at 40 mm from the detector and 201 frames were measured each for 125 s over 1° scan width. The unit cell determination and data integration were carried out using the CrysAlis package of Oxford Diffraction [1]. The structures were solved by Intrinsic Phasing using Olex2 [2] software with the SHELXT [3] structure solution program and refined by full-matrix least-squares on  $F^2$  with SHELXL-2015 [4] using an anisotropic model for non-hydrogen atoms. In the absence of significant anomalous scattering, the absolute configuration of the structures could not be reliably determined. Friedel pairs were merged and any references to the Flack parameter were removed. The H atoms were placed geometrically and constrained to ride on their parent atoms with  $d_{CH} = 0.96 \text{ \AA}$  and  $U_{iso}$  values of 1.2U $_{eq}$  of the parent atoms. The crystallographic data and refinement details are quoted in Table S1, while bond lengths and angles are given in Table S2.

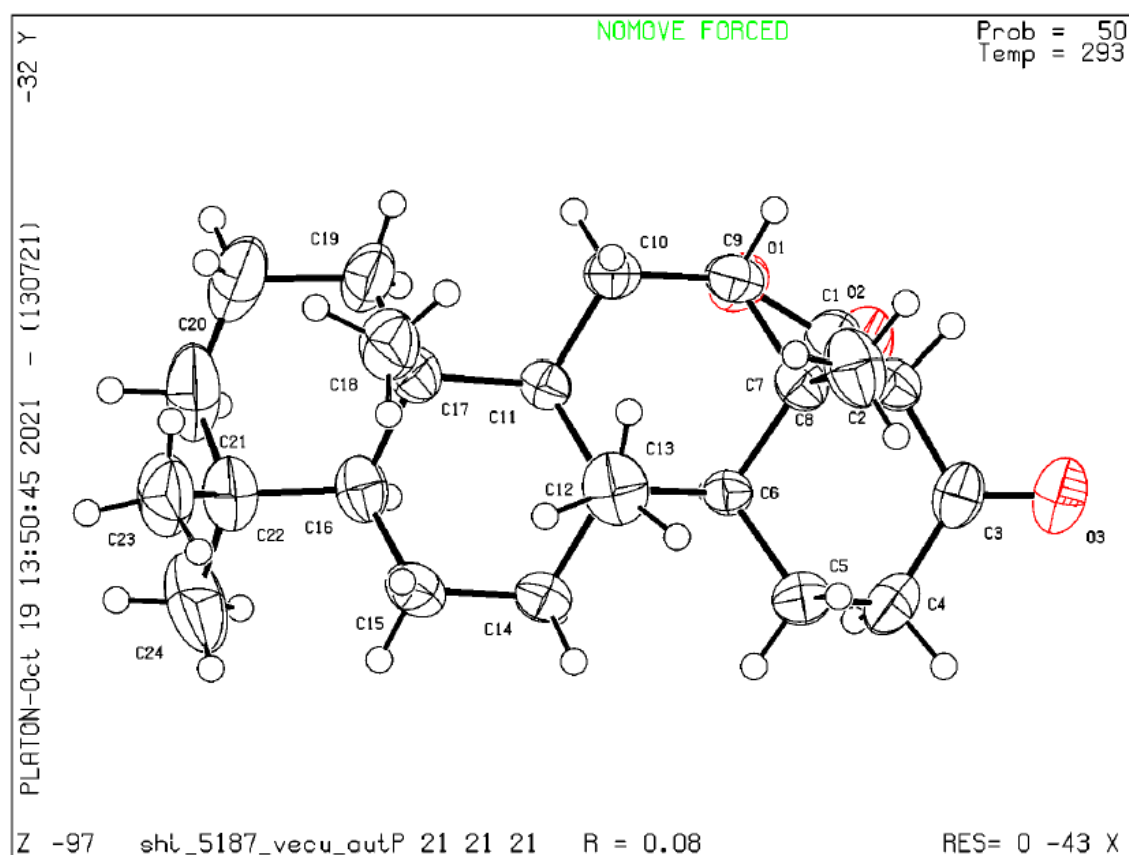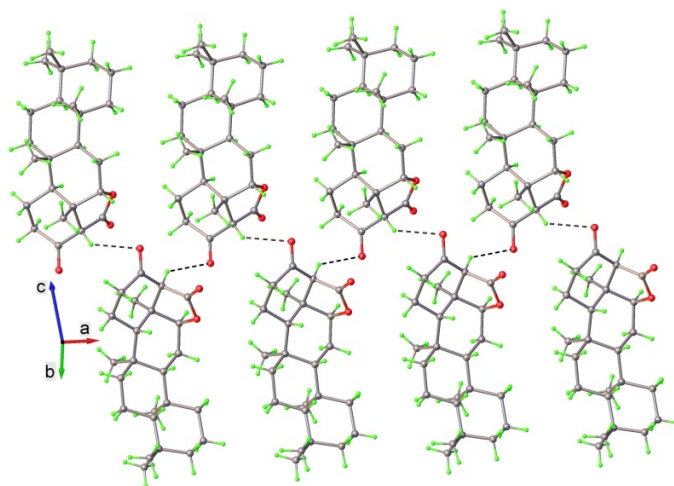

**Figure S1.** X-ray molecular structure of compound (8) and a view of 1D architecture showing the role of intermolecular of H-bonds.

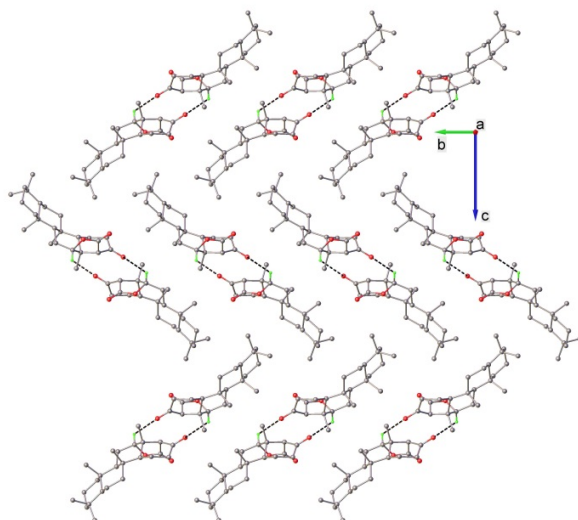

**Figure S2.** Partial view of the crystal structure along *a* axis.

**Table S1.** The crystallographic data and refinement details.

|                                             |                    |
|---------------------------------------------|--------------------|
|                                             | 5187               |
| empirical formula                           | $C_{24}H_{36}O_3$  |
| <i>FW</i>                                   | 372.53             |
| space group                                 | $P2_12_12_1$       |
| <i>a</i> [Å]                                | 7.3866(4)          |
| <i>b</i> [Å]                                | 10.3133(7)         |
| <i>c</i> [Å]                                | 26.874(2)          |
| <i>V</i> [Å <sup>3</sup> ]                  | 2047.3(2)          |
| <i>Z</i>                                    | 4                  |
| $\rho_{\text{calcd}}$ [g cm <sup>-3</sup> ] | 1.209              |
| Crystal size [mm]                           | 0.30 × 0.02 × 0.02 |
| <i>T</i> [K]                                | 293                |
| $\mu$ [mm <sup>-1</sup> ]                   | 0.077              |

|                            |                                 |
|----------------------------|---------------------------------|
| 2 $\Theta$ range [°]       | 4.23 to 58.912                  |
| Reflections collected      | 9276                            |
| Independent reflections    | 4612[ $R_{\text{int}}=0.0541$ ] |
| Data/restraints/parameters | 4612/0/249                      |
| $R_1^{\text{[a]}}$         | 0.0772                          |
| $wR_2^{\text{[b]}}$        | 0.1231                          |
| GOF <sup>[c]</sup>         | 1.005                           |
| CCDC No.                   | 2116545                         |

<sup>a</sup> $R_1 = \Sigma ||F_o| - |F_c|| / \Sigma |F_o|$ . <sup>b</sup> $wR_2 = \{\Sigma[w(F_o^2 - F_c^2)^2] / \Sigma[w(F_o^2)^2]\}^{1/2}$ . <sup>c</sup>GOF =  $\{\Sigma[w(F_o^2 - F_c^2)^2] / (n-p)\}^{1/2}$ , where  $n$  is the number of reflections and  $p$  is the total number of parameters refined [1].

**Table S2.** (a) Bond distances (Å) and (b) angles (°) for compound 8.

| a     |          | b        |          |
|-------|----------|----------|----------|
| O1-C1 | 1.354(6) | C1-O1-C9 | 109.6(4) |
| O1-C9 | 1.454(6) | O1-C1-C2 | 109.2(5) |
| O2-C1 | 1.195(6) | O2-C1-O1 | 122.2(5) |
| O3-C3 | 1.204(5) | O2-C1-C2 | 128.5(5) |
| C1-C2 | 1.508(6) | C1-C2-C7 | 102.3(4) |
| C2-C3 | 1.501(6) | C3-C2-C1 | 115.3(4) |
| C2-C7 | 1.535(6) | C3-C2-C7 | 116.4(4) |
| C3-C4 | 1.499(7) | O3-C3-C2 | 120.4(5) |
| C4-C5 | 1.524(7) | O3-C3-C4 | 121.9(5) |
| C5-C6 | 1.523(5) | C4-C3-C2 | 117.6(5) |
| C6-C7 | 1.549(6) | C3-C4-C5 | 112.8(5) |

|         |          |             |          |
|---------|----------|-------------|----------|
| C6-C12  | 1.547(6) | C6-C5-C4    | 110.0(4) |
| C7-C8   | 1.534(6) | C5-C6-C7    | 109.5(4) |
| C7-C9   | 1.521(6) | C5-C6-C12   | 119.2(3) |
| C9-C10  | 1.505(6) | C12-C6-C7   | 115.2(4) |
| C10-C11 | 1.530(5) | C2-C7-C6    | 107.3(4) |
| C11-C12 | 1.560(5) | C8-C7-C2    | 109.9(4) |
| C11-C17 | 1.549(6) | C8-C7-C6    | 116.8(4) |
| C12-C13 | 1.543(6) | C9-C7-C2    | 99.8(3)  |
| C12-C14 | 1.530(6) | C9-C7-C6    | 109.4(4) |
| C14-C15 | 1.518(6) | C9-C7-C8    | 112.1(4) |
| C15-C16 | 1.521(6) | O1-C9-C7    | 104.3(4) |
| C16-C17 | 1.554(6) | O1-C9-C10   | 110.4(4) |
| C16-C22 | 1.546(7) | C10-C9-C7   | 115.4(4) |
| C17-C18 | 1.542(6) | C9-C10-C11  | 113.8(4) |
| C17-C19 | 1.546(6) | C10-C11-C12 | 110.6(4) |
| C19-C20 | 1.525(7) | C10-C11-C17 | 114.4(4) |
| C20-C21 | 1.500(8) | C17-C11-C12 | 116.8(4) |
| C21-C22 | 1.514(7) | C6-C12-C11  | 105.8(3) |
| C22-C23 | 1.525(7) | C13-C12-C6  | 111.3(4) |
| C22-C24 | 1.542(7) | C13-C12-C11 | 115.9(4) |
|         |          | C14-C12-C6  | 108.4(4) |
|         |          | C14-C12-C11 | 107.8(4) |
|         |          | C14-C12-C13 | 107.4(4) |

|             |          |
|-------------|----------|
| C15-C14-C12 | 113.2(4) |
| C14-C15-C16 | 111.9(4) |
| C15-C16-C17 | 110.4(4) |
| C15-C16-C22 | 115.0(4) |
| C22-C16-C17 | 117.3(4) |
| C11-C17-C16 | 106.3(4) |
| C18-C17-C11 | 111.7(4) |
| C18-C17-C16 | 114.3(4) |
| C18-C17-C19 | 108.2(4) |
| C19-C17-C11 | 108.4(4) |
| C19-C17-C16 | 107.6(4) |
| C20-C19-C17 | 112.4(4) |
| C21-C20-C19 | 111.9(5) |
| C20-C21-C22 | 114.4(5) |
| C21-C22-C16 | 107.5(5) |
| C21-C22-C23 | 110.4(5) |
| C21-C22-C24 | 107.2(6) |
| C23-C22-C16 | 115.1(5) |
| C23-C22-C24 | 107.3(5) |
| C24-C22-C16 | 109.0(5) |

## NMR SPECTRA

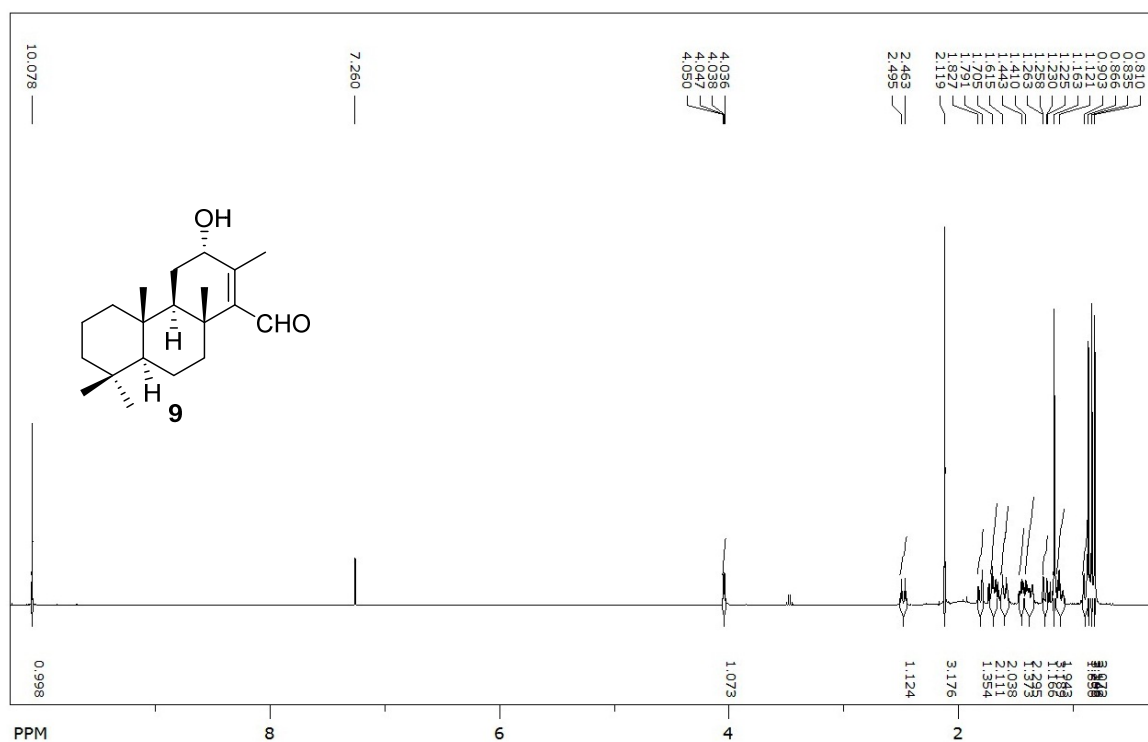

<sup>1</sup>H-NMR spectrum for compound **9** (CDCl<sub>3</sub>, 400.13 MHz).

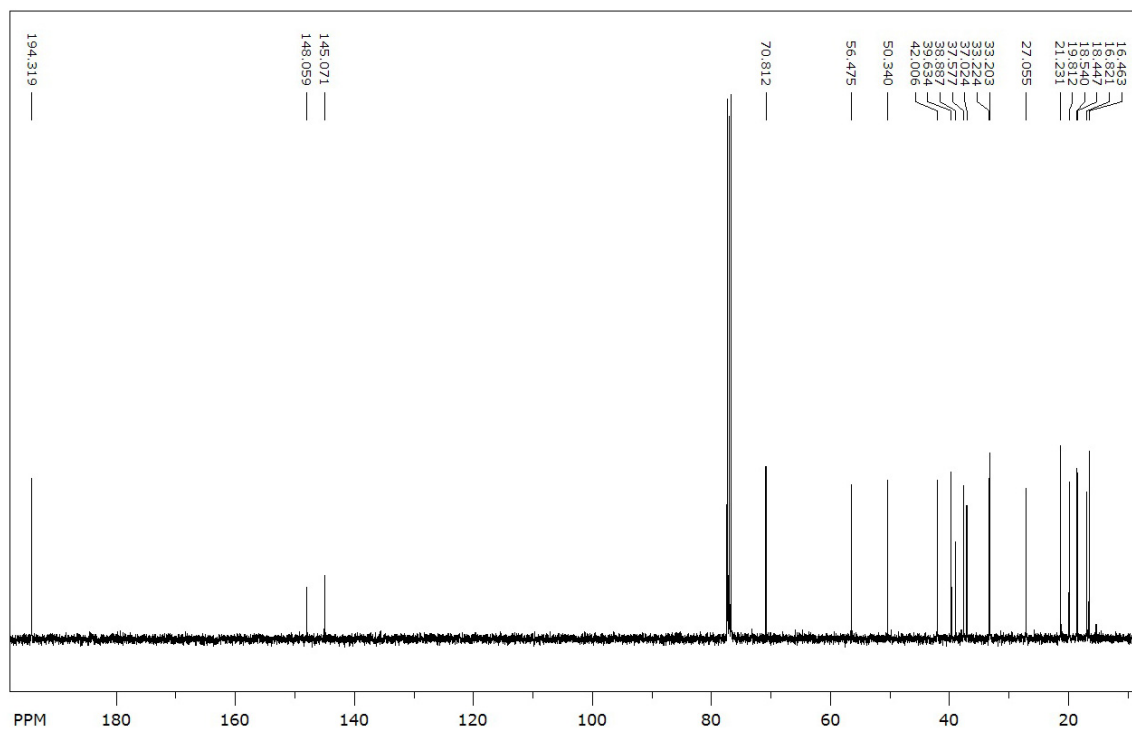

<sup>13</sup>C-NMR spectrum for compound **9** (CDCl<sub>3</sub>, 100.61 MHz).



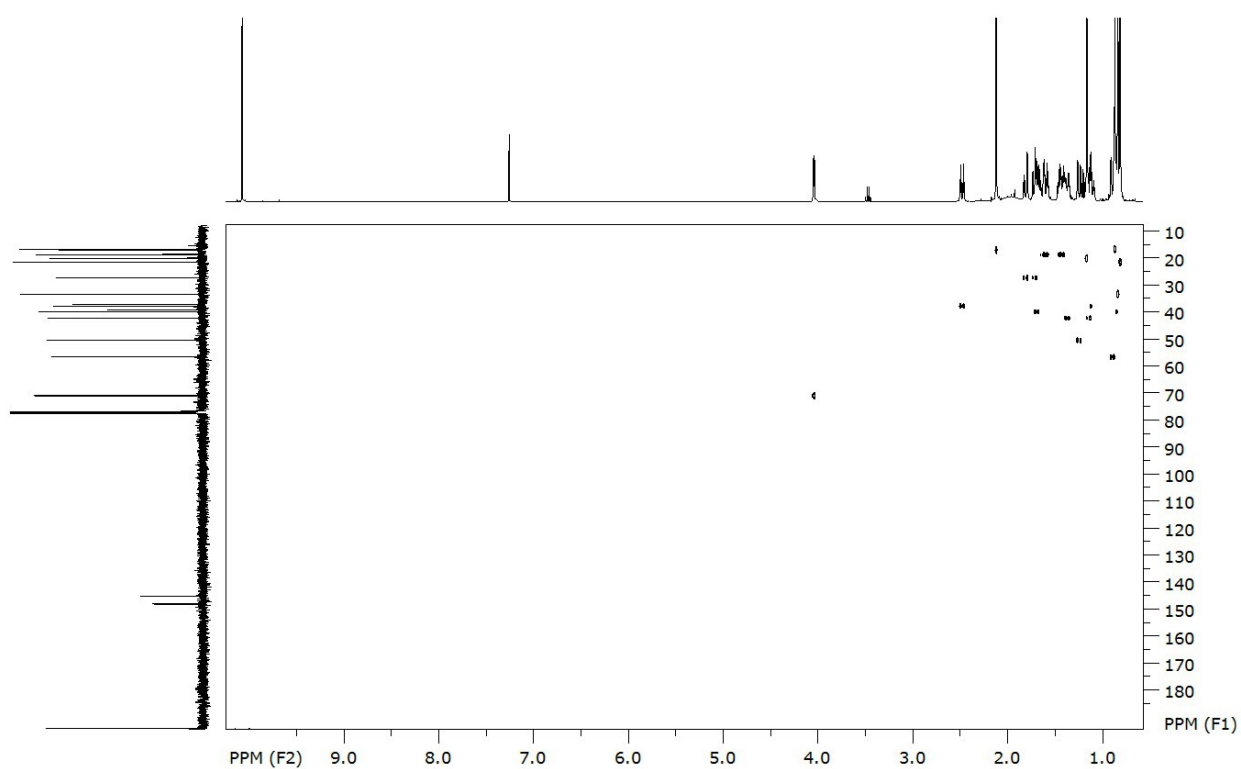

$^1\text{H}$ ,  $^{13}\text{C}$  HSQC spectrum for compound **9**.

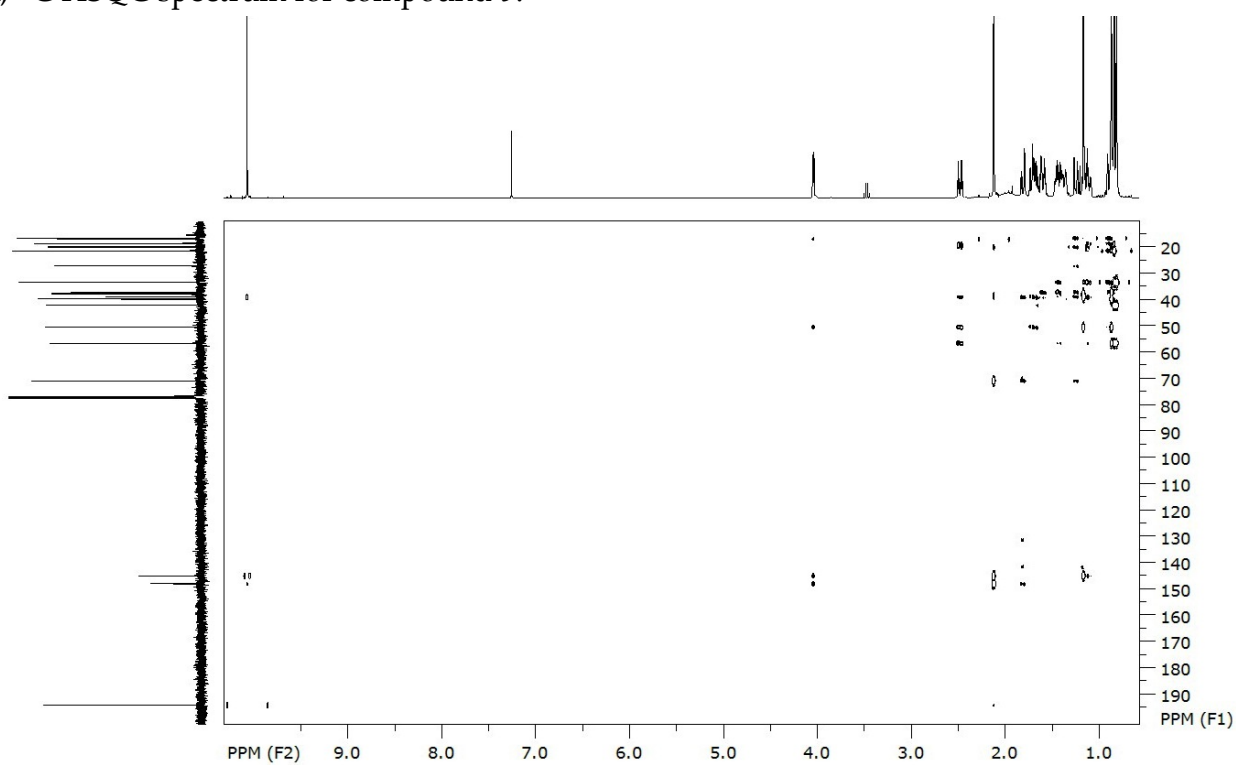

$^1\text{H}$ ,  $^{13}\text{C}$  HMBC spectrum for compound **9**.

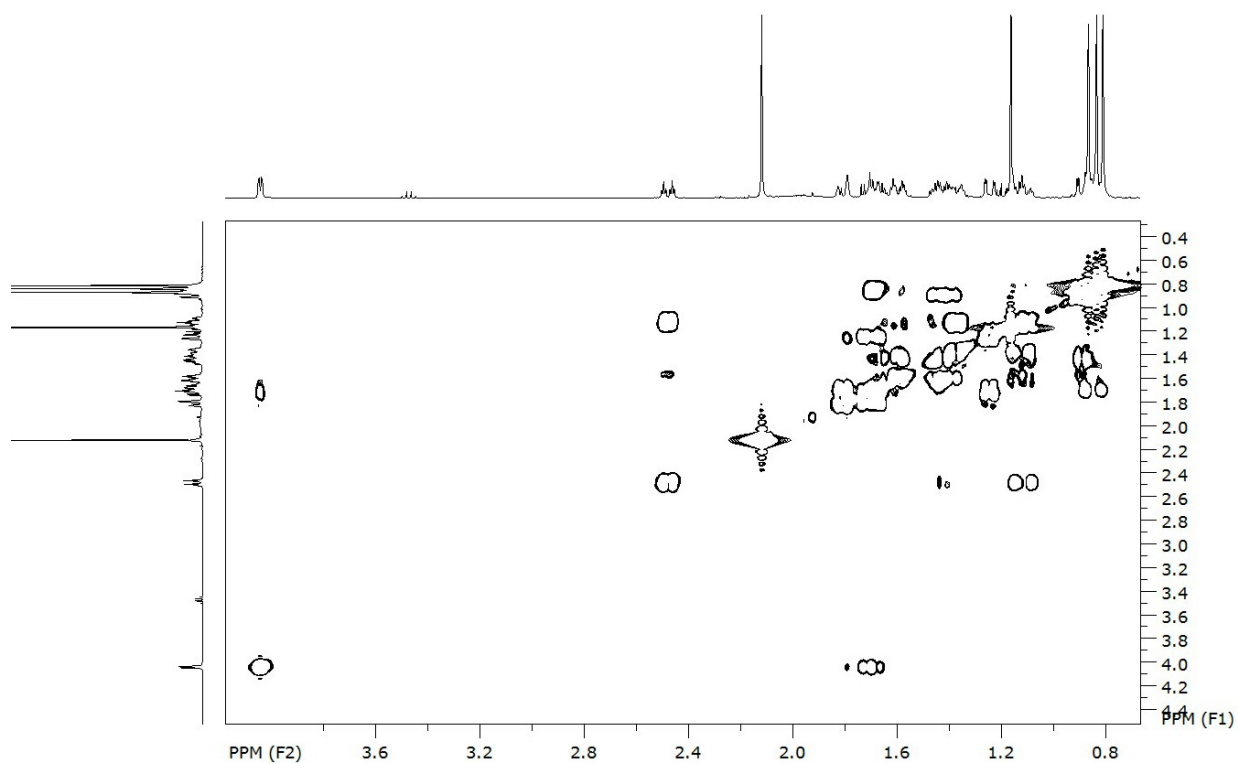

$^1\text{H}$ - $^1\text{H}$  COSY spectrum for compound **9**.

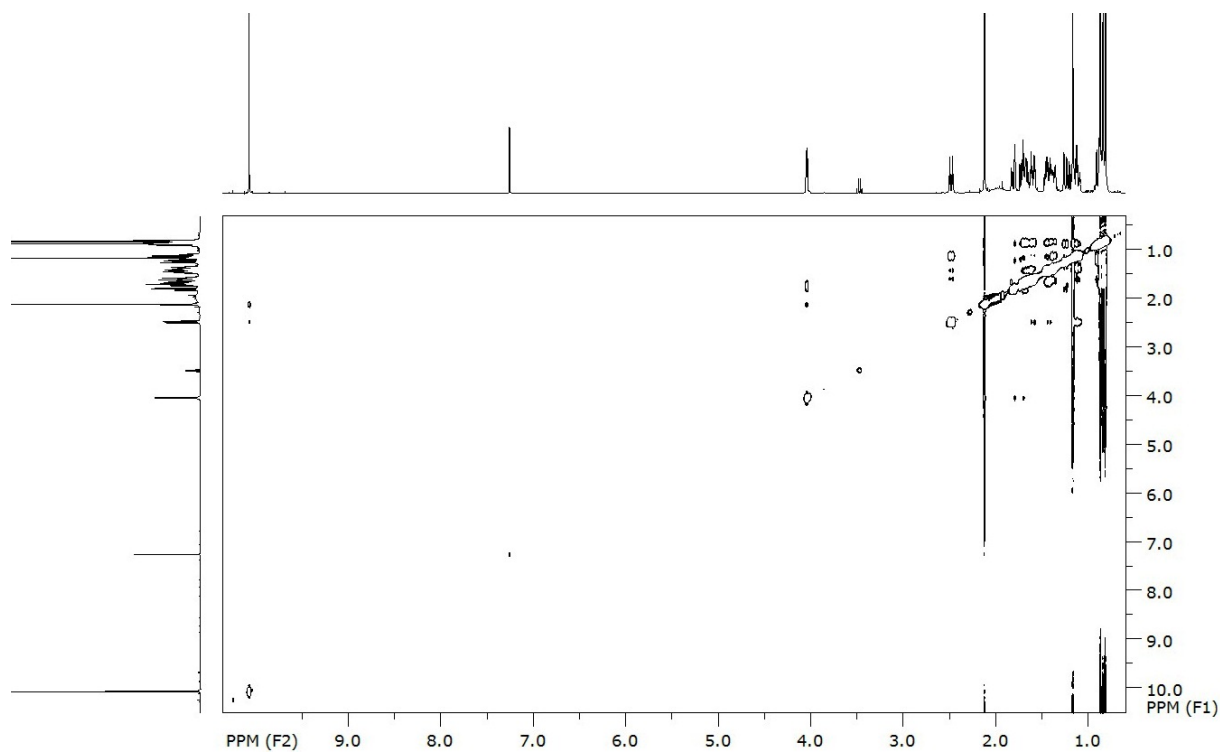

$^1\text{H}$ - $^1\text{H}$  NOESY spectrum for compound **9**.

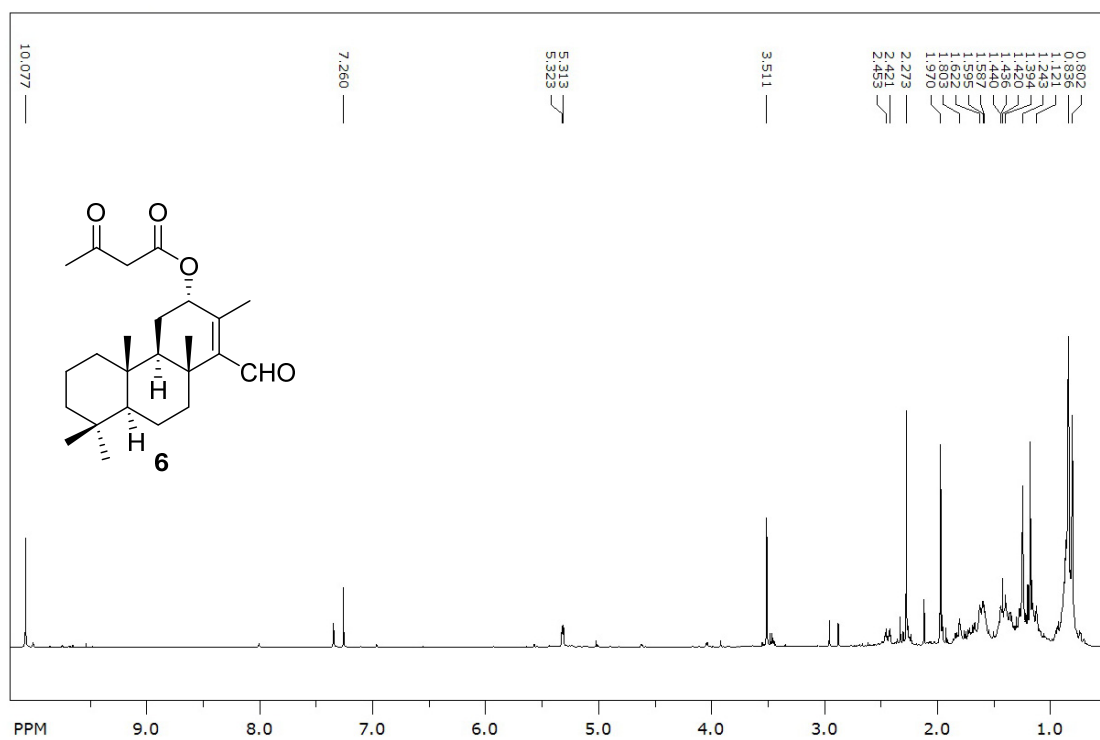

<sup>1</sup>H-NMR spectrum for compound **6** (CDCl<sub>3</sub>, 400.13 MHz).

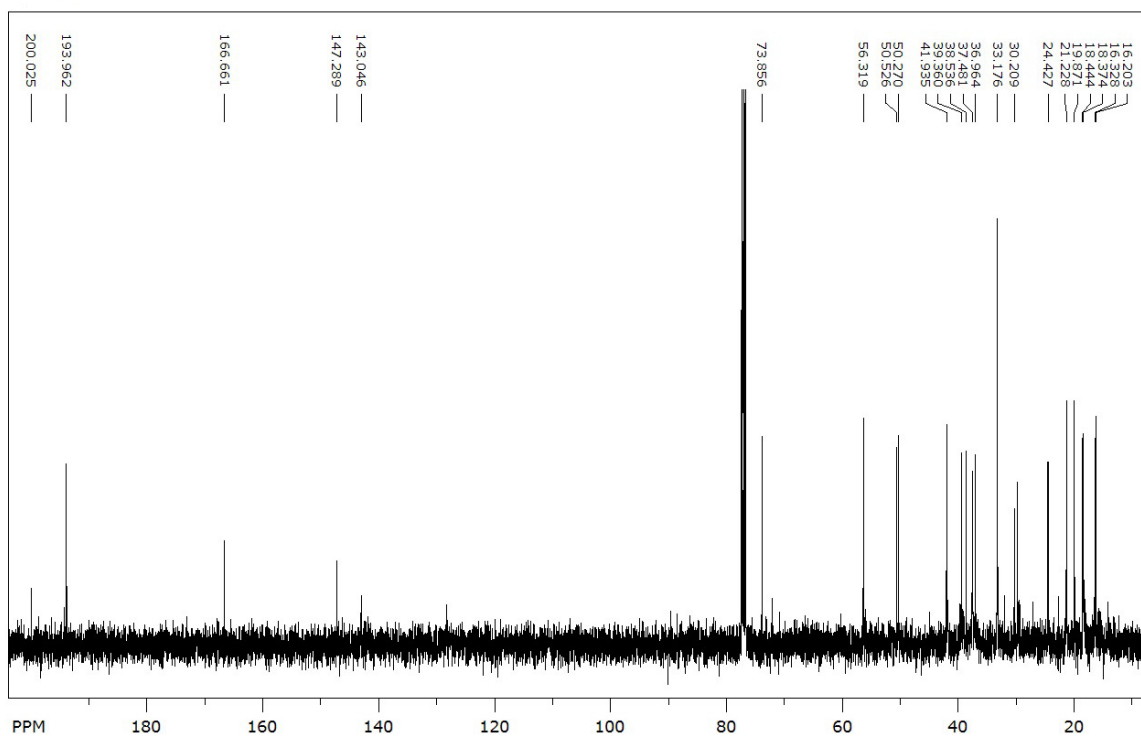

<sup>13</sup>C-NMR spectrum for compound **6** (CDCl<sub>3</sub>, 100.61 MHz).

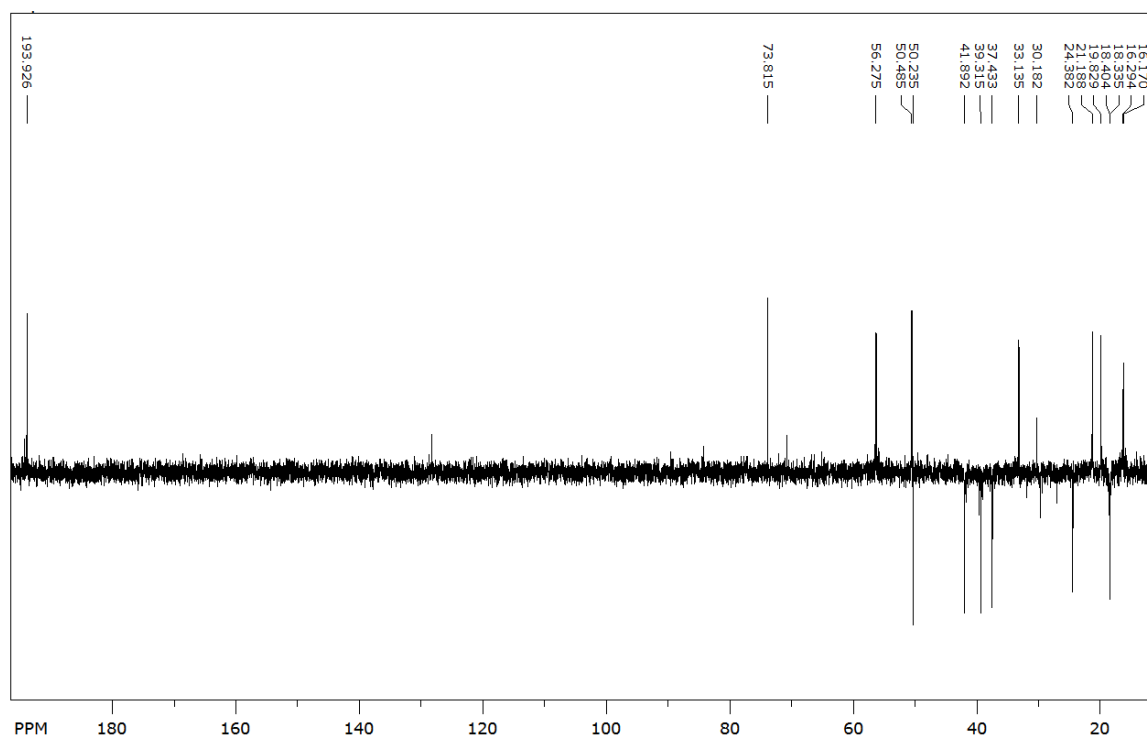

$^{13}\text{C}$  DEPT spectrum for compound **6** ( $\text{CDCl}_3$ , 100.61 MHz).

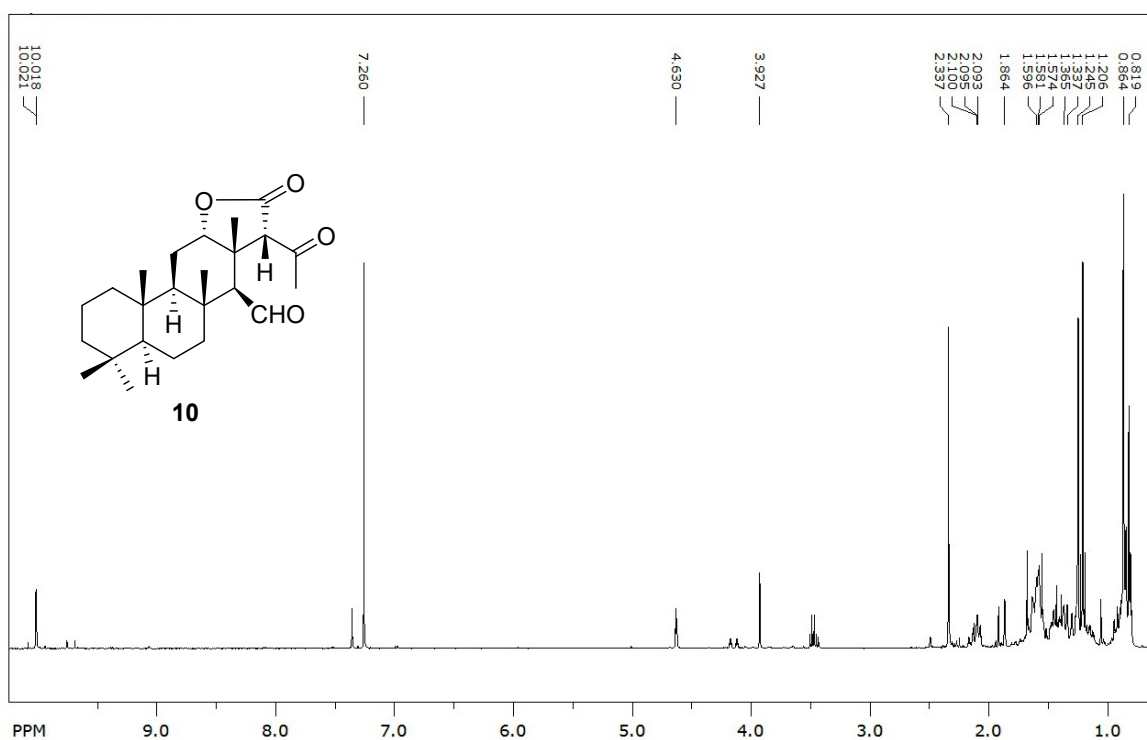

$^1\text{H}$ -NMR spectrum for compound **10** ( $\text{CDCl}_3$ , 400.13 MHz).

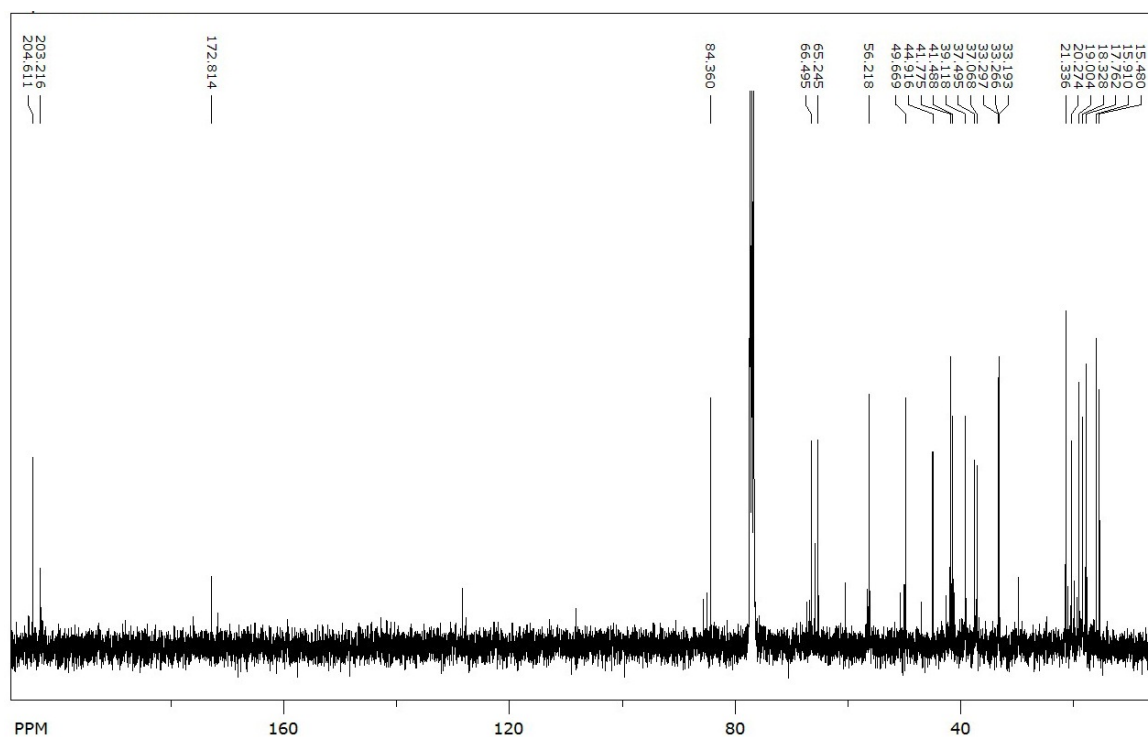

$^{13}\text{C}$ -NMR spectrum for compound **10** ( $\text{CDCl}_3$ , 100.61 MHz).

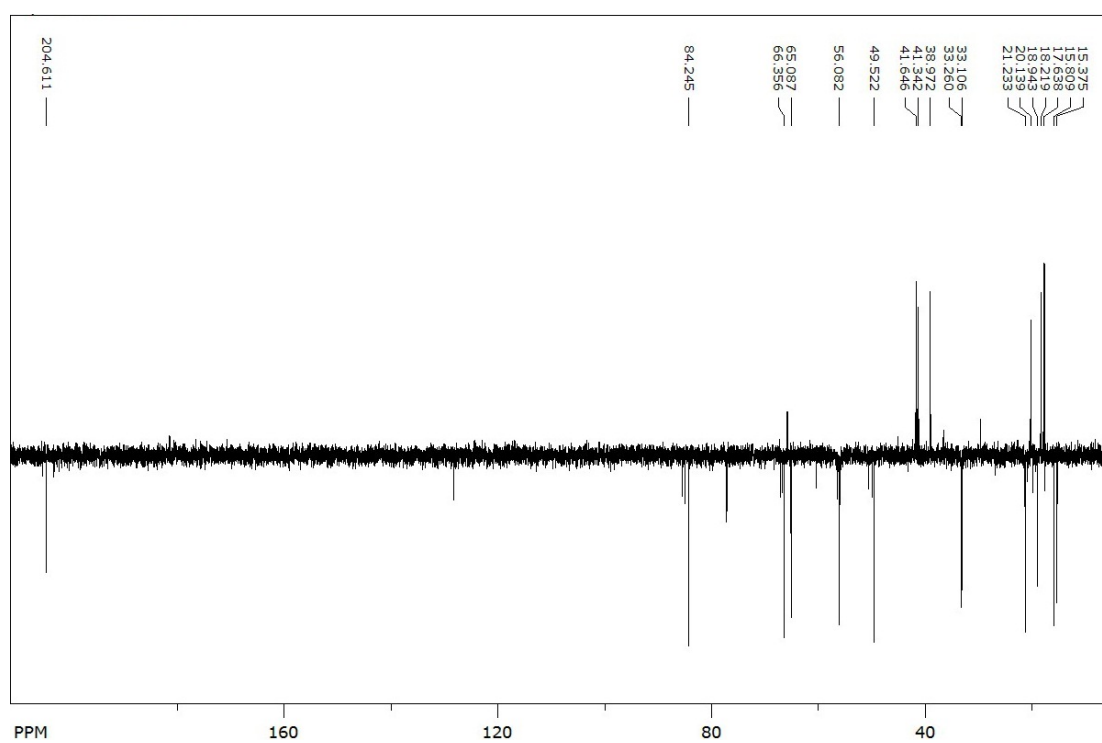

$^{13}\text{C}$  DEPT spectrum for compound **10** ( $\text{CDCl}_3$ , 100.61 MHz).

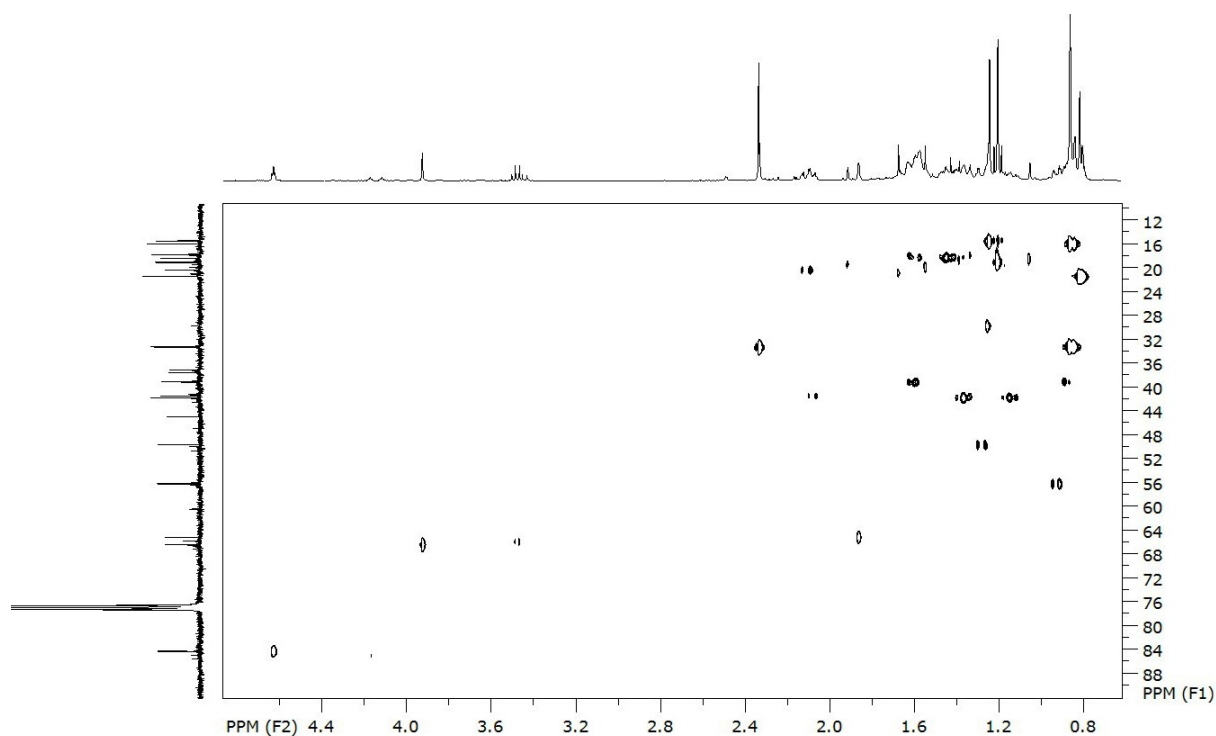

$^1\text{H}$ ,  $^{13}\text{C}$  HSQC spectrum for compound 10.

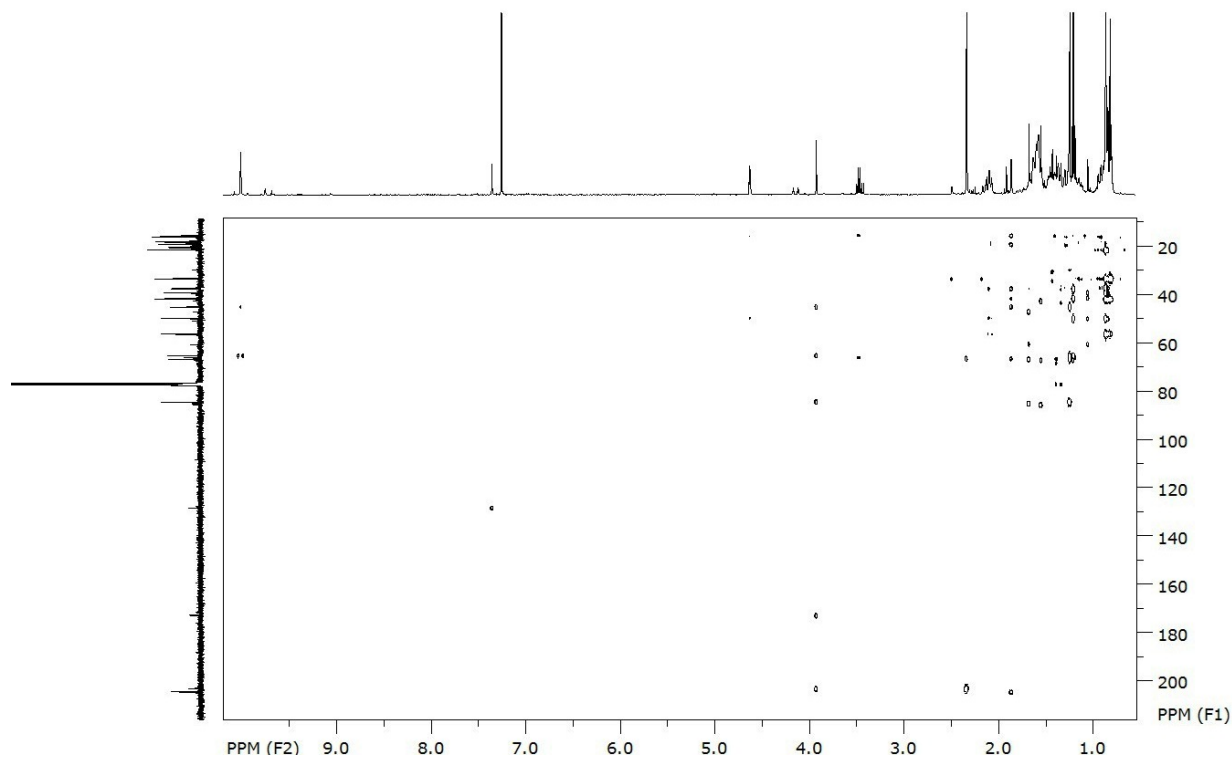

$^1\text{H}$ ,  $^{13}\text{C}$  HMBC spectrum for compound 10.

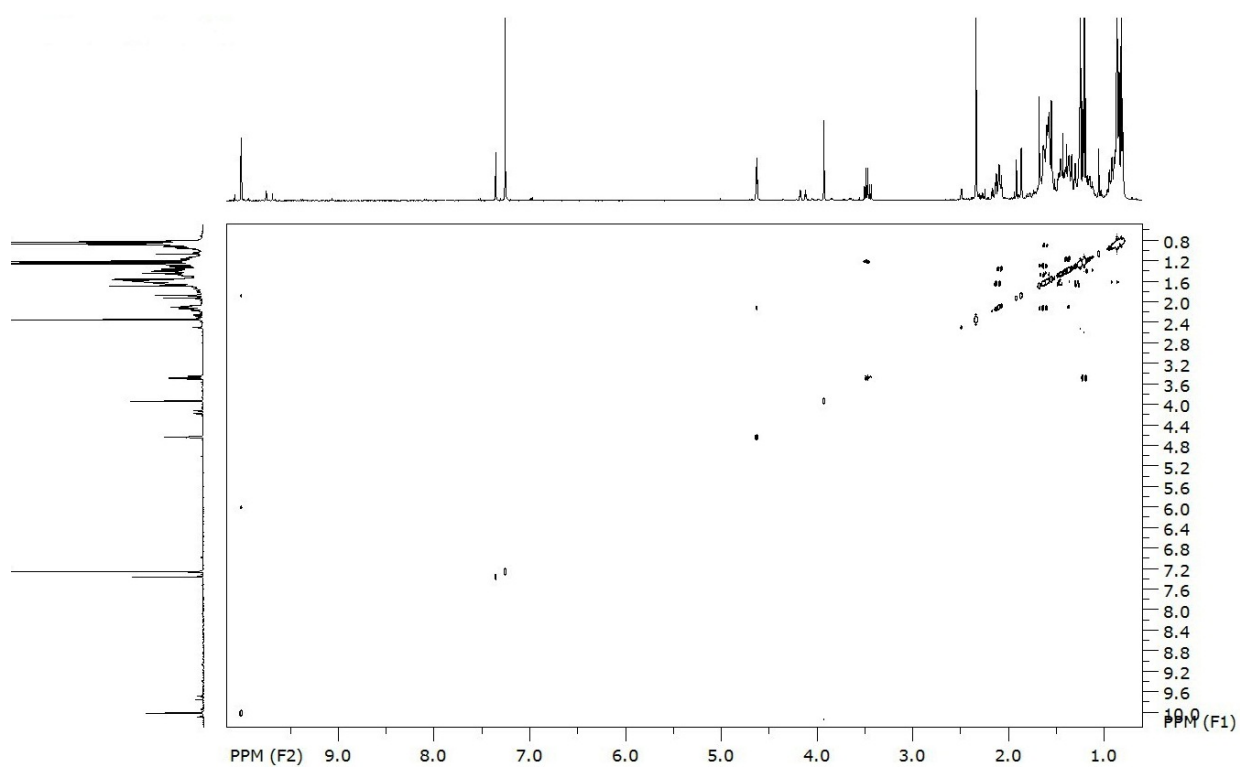

$^1\text{H}$ - $^1\text{H}$  COSY spectrum for compound **10**.

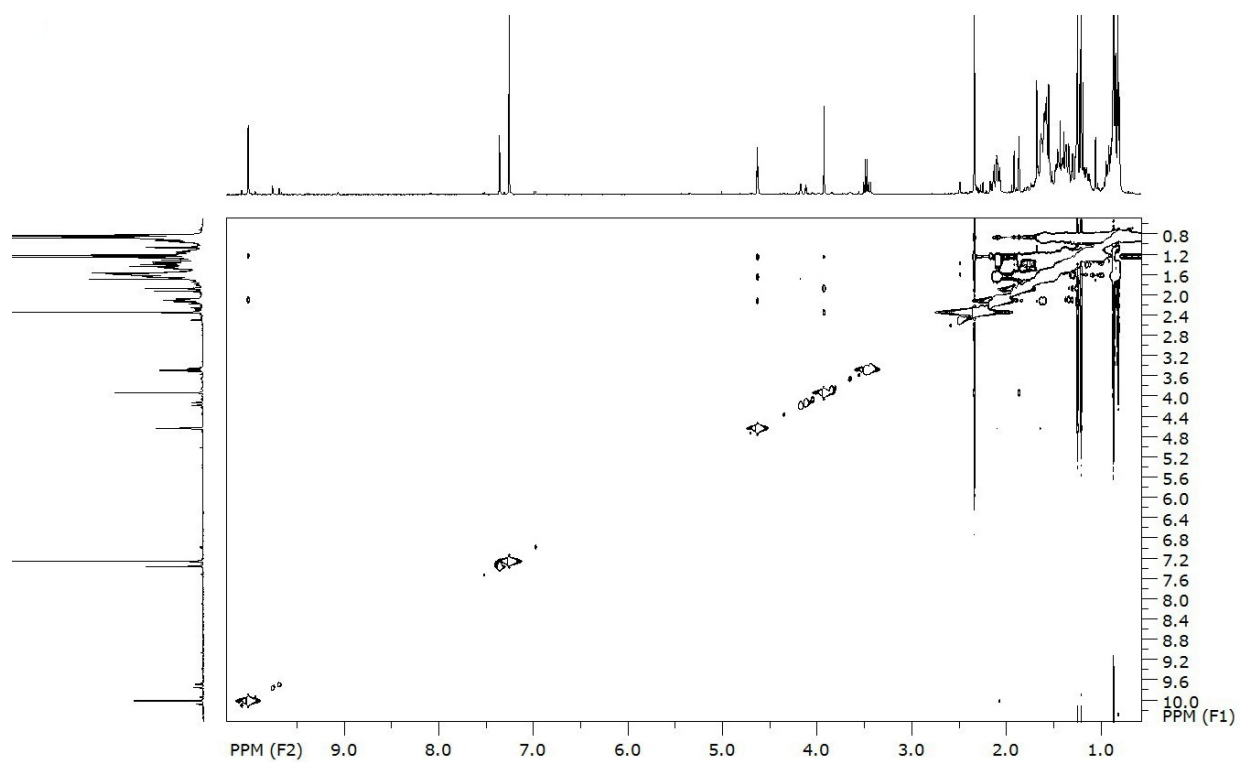

$^1\text{H}$ - $^1\text{H}$  NOESY spectrum for compound **10**.

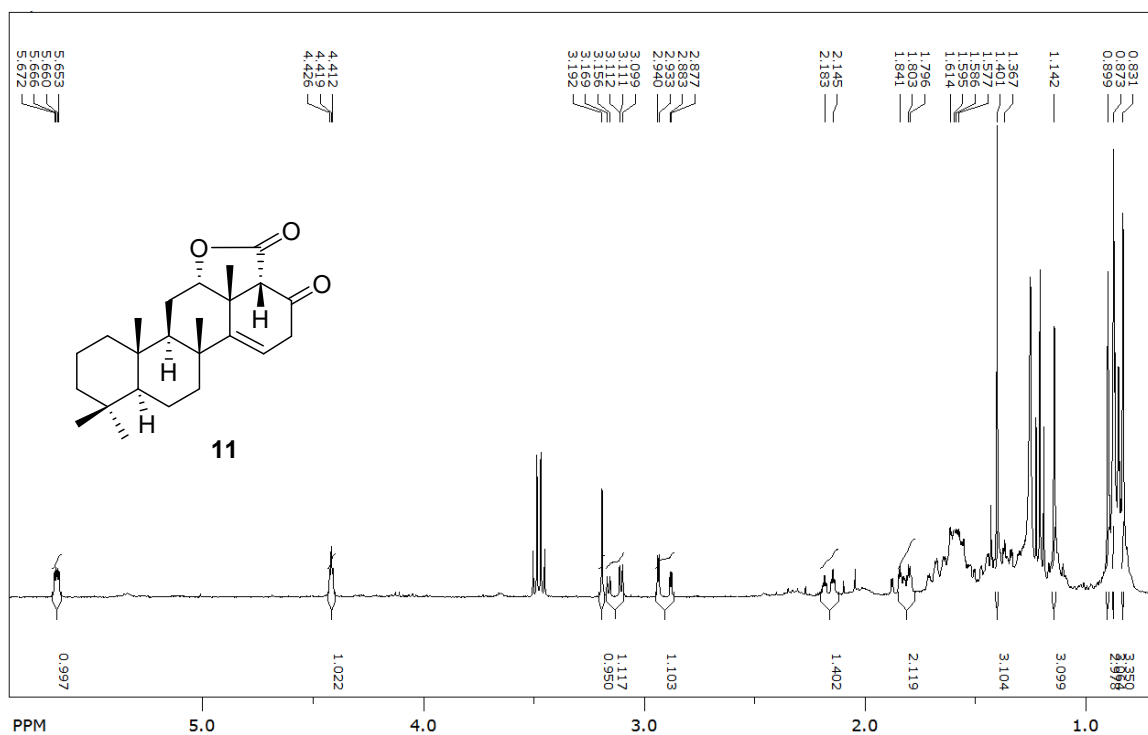

<sup>1</sup>H-NMR spectrum for compound **11** (CDCl<sub>3</sub>, 400.13 MHz).

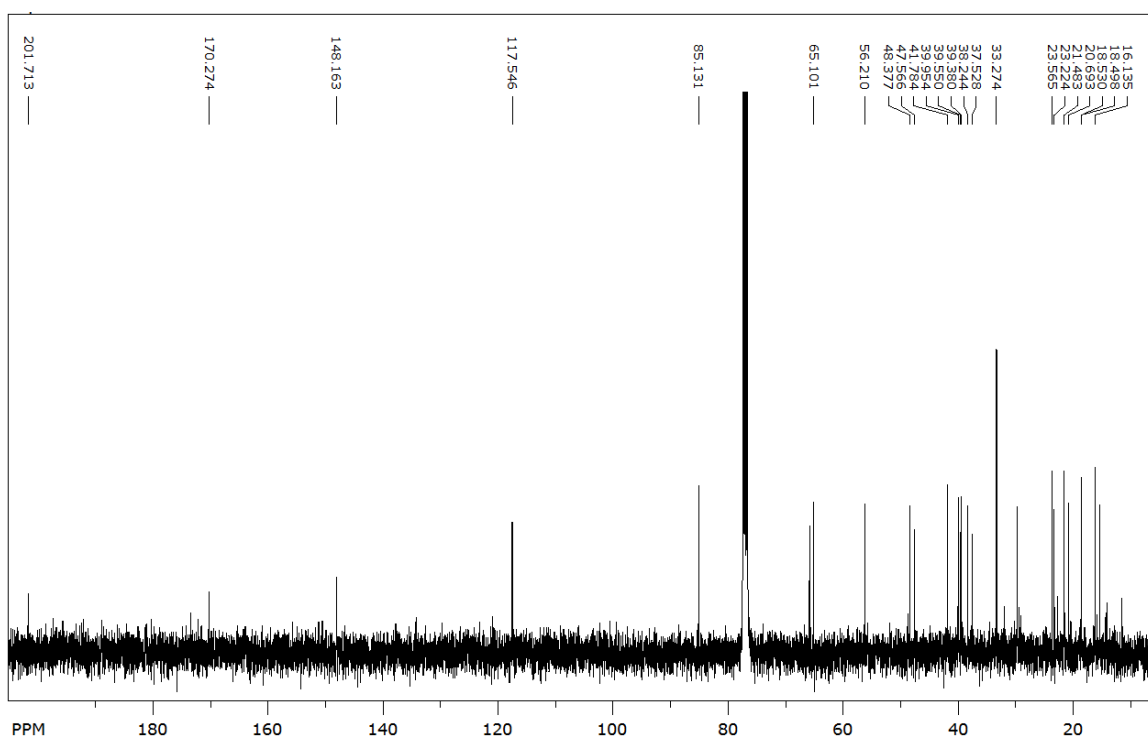

<sup>13</sup>C-NMR spectrum for compound **11** (CDCl<sub>3</sub>, 100.61 MHz).



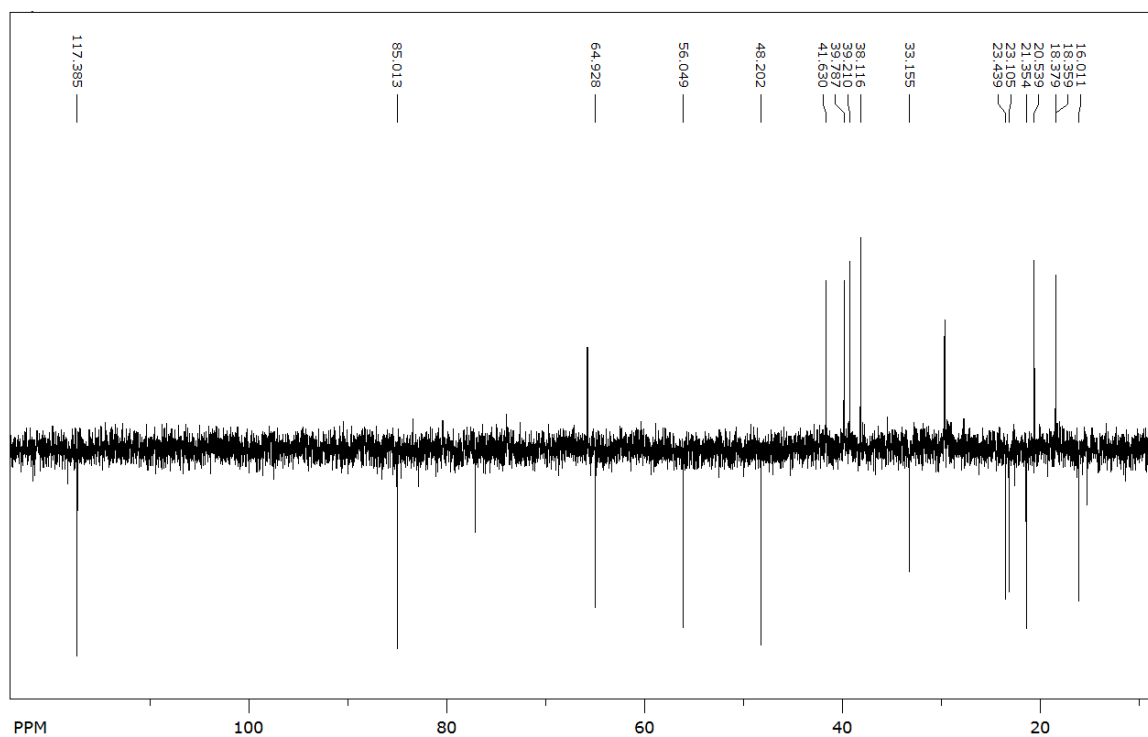

$^{13}\text{C}$  DEPT spectrum for compound **11** ( $\text{CDCl}_3$ , 100.61 MHz).

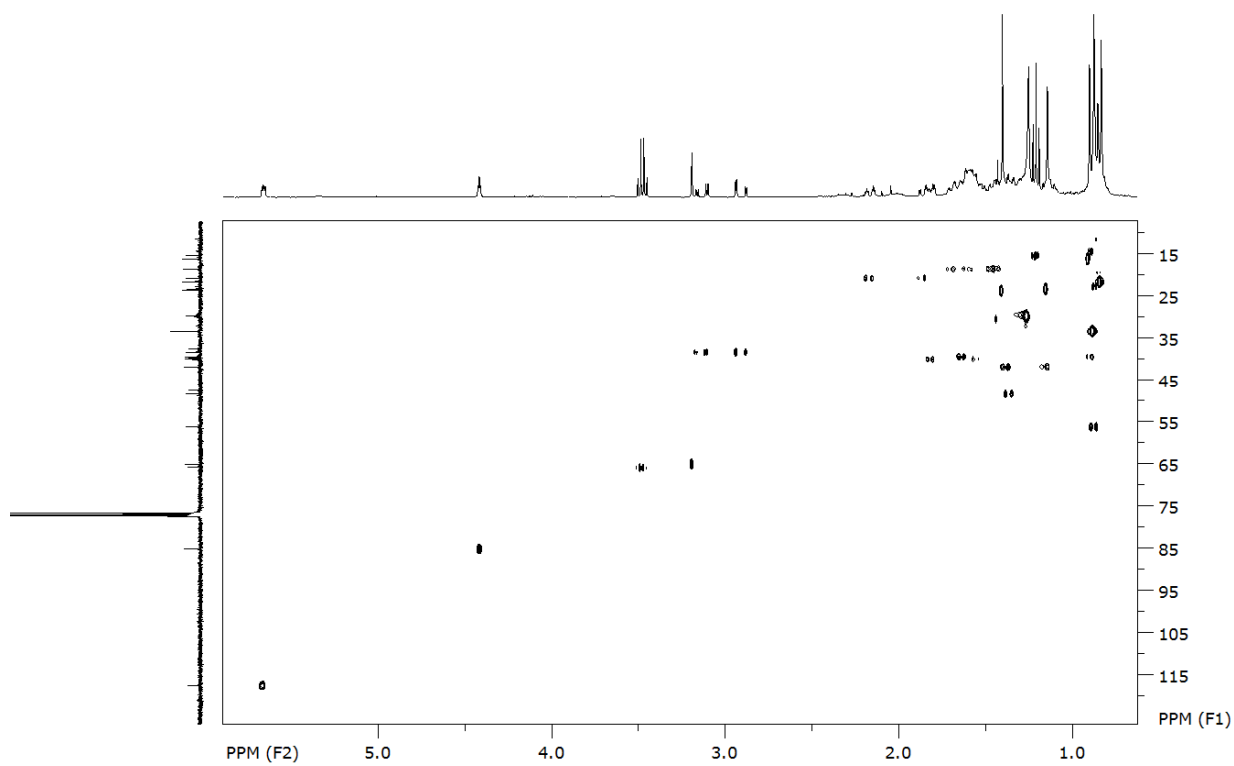

$^1\text{H}$ ,  $^{13}\text{C}$  HSQC spectrum for compound **11**.

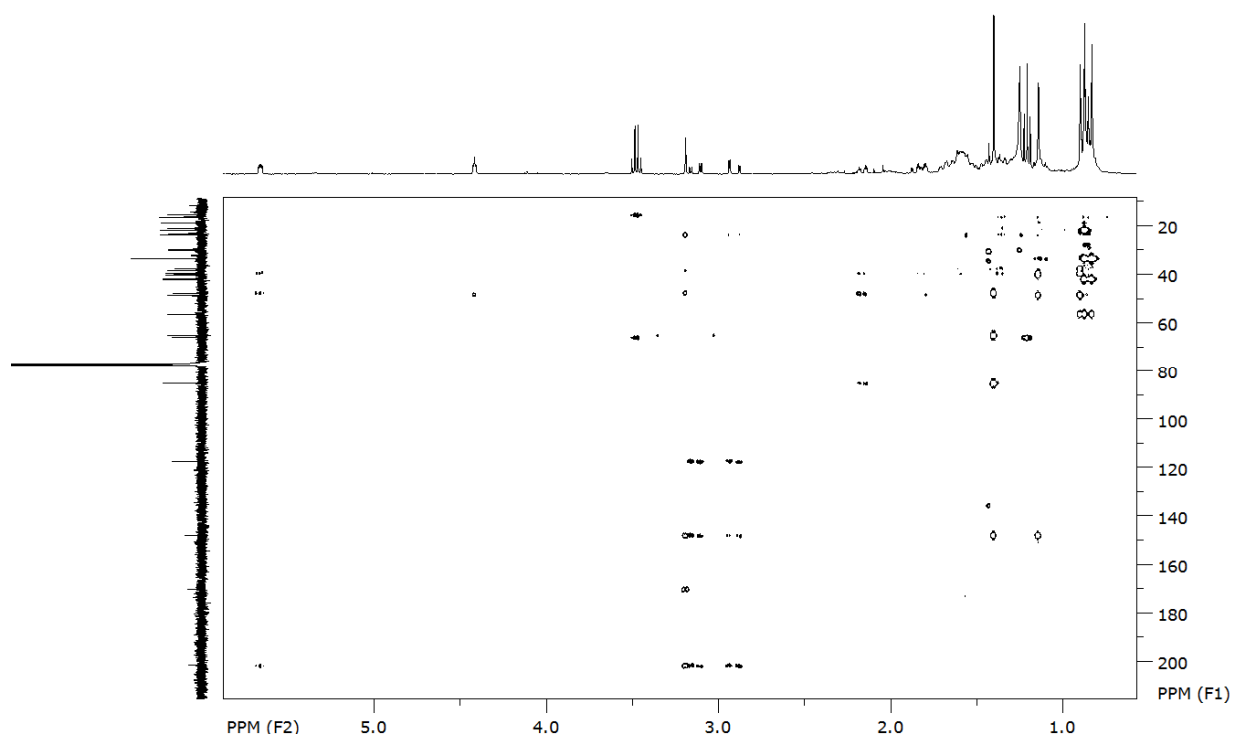

$^1\text{H}$ ,  $^{13}\text{C}$  HMBC spectrum for compound **11**.

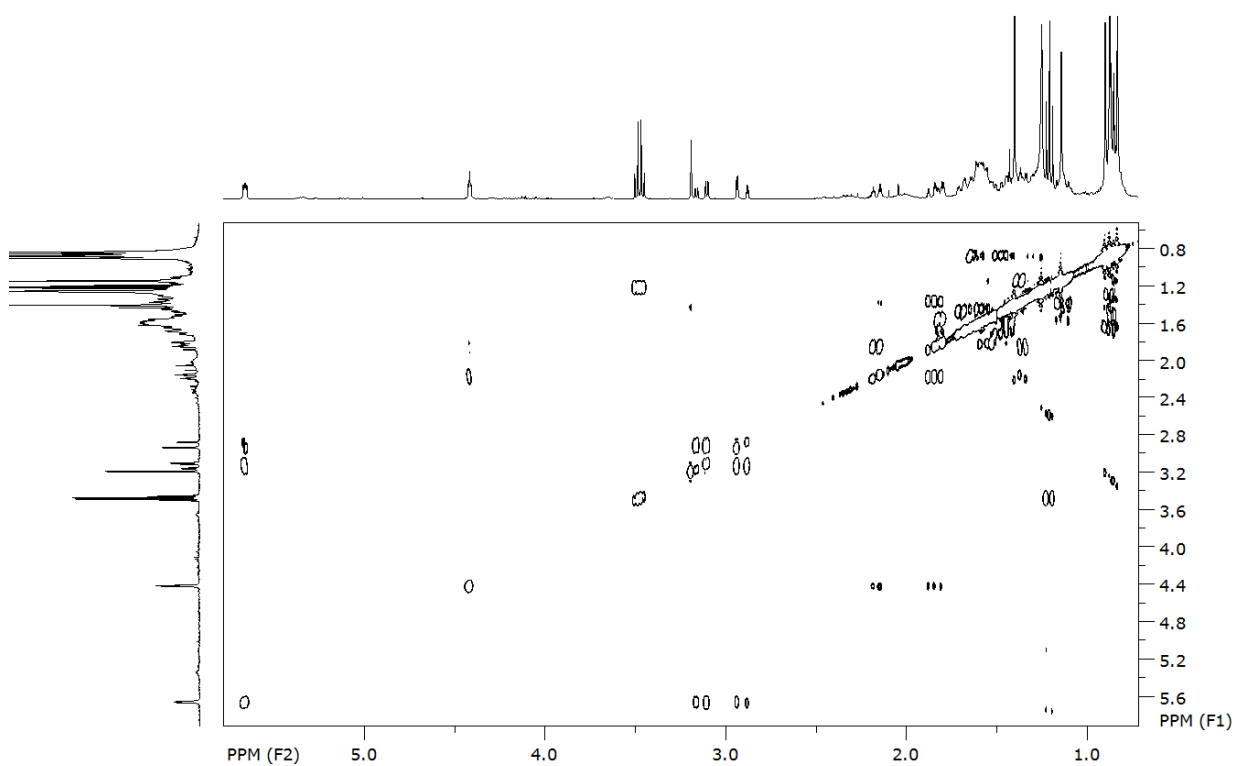

$^1\text{H}$ - $^1\text{H}$  COSY spectrum for compound **11**.

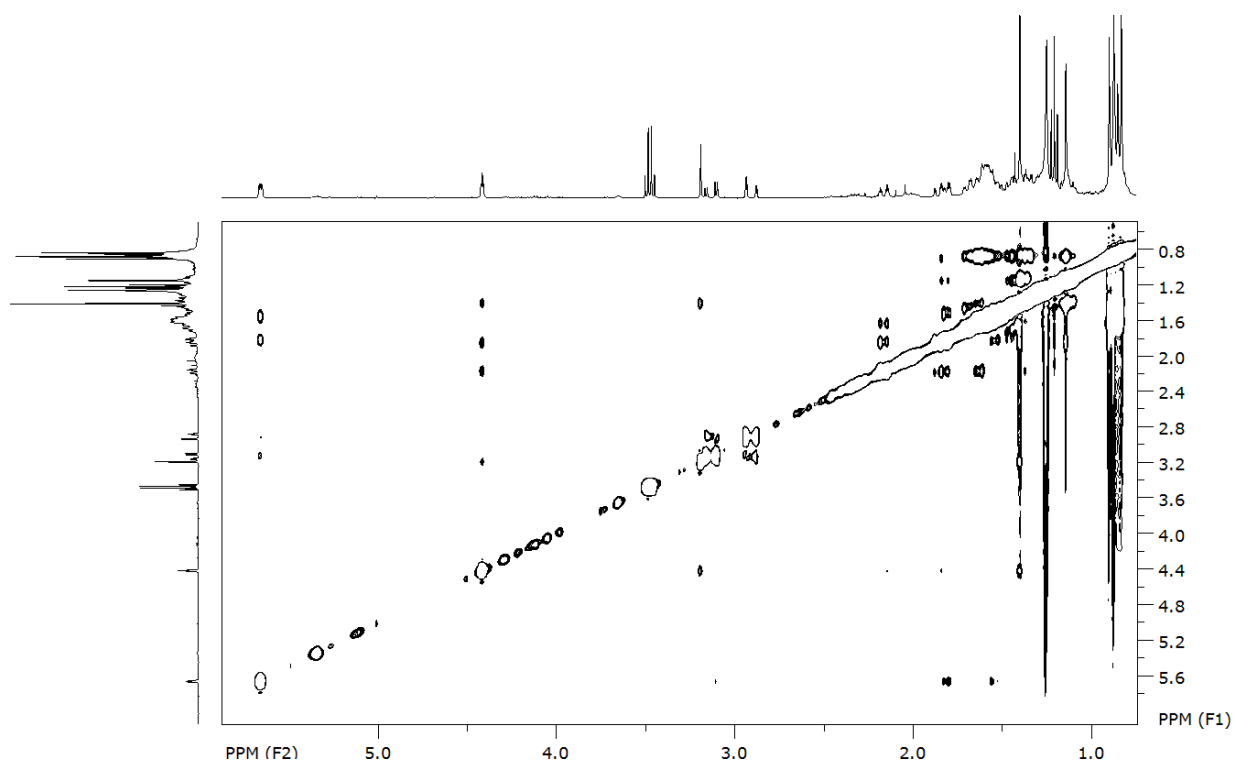

$^1\text{H}$ - $^1\text{H}$  NOESY spectrum for compound **11**.

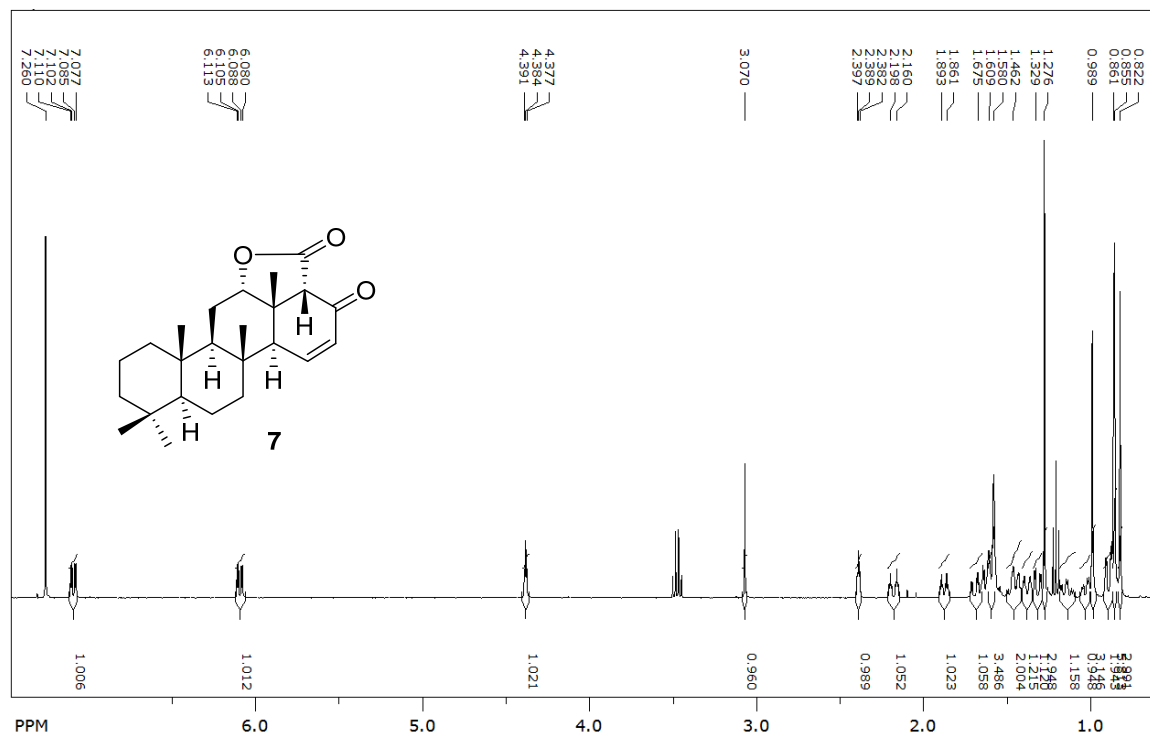

$^1\text{H}$ -NMR spectrum for compound **7** ( $\text{CDCl}_3$ , 400.13 MHz).

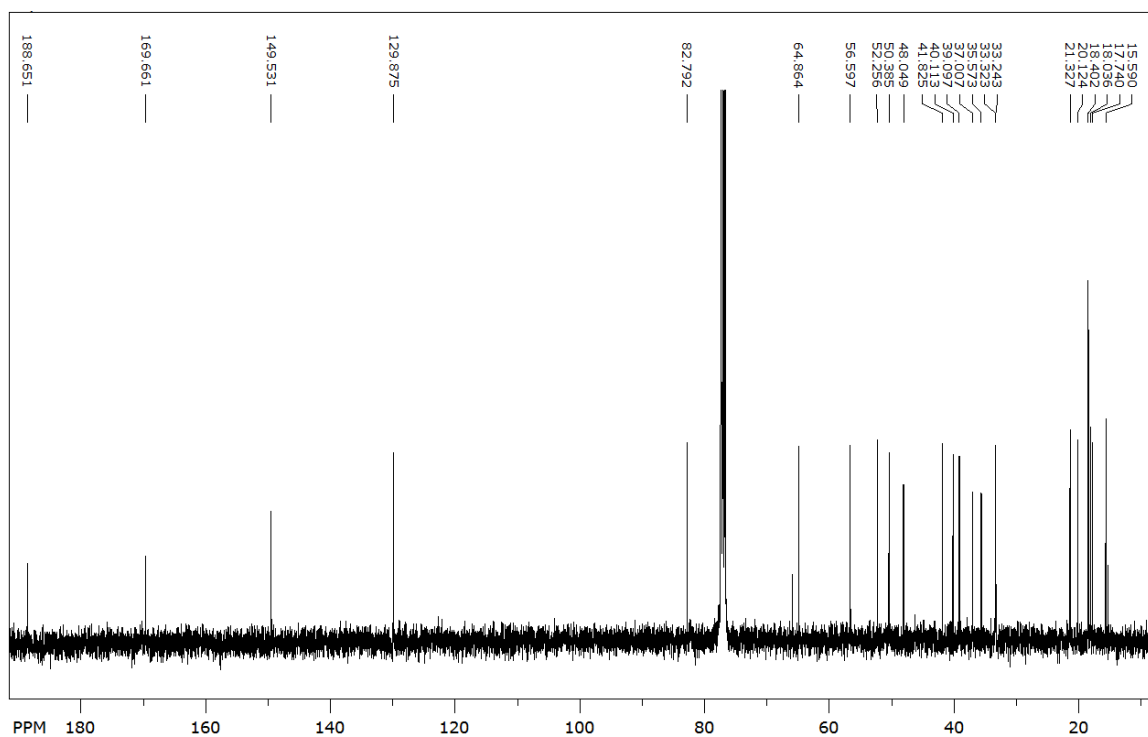

<sup>13</sup>C-NMR spectrum for compound 7 (CDCl<sub>3</sub>, 100.61 MHz).

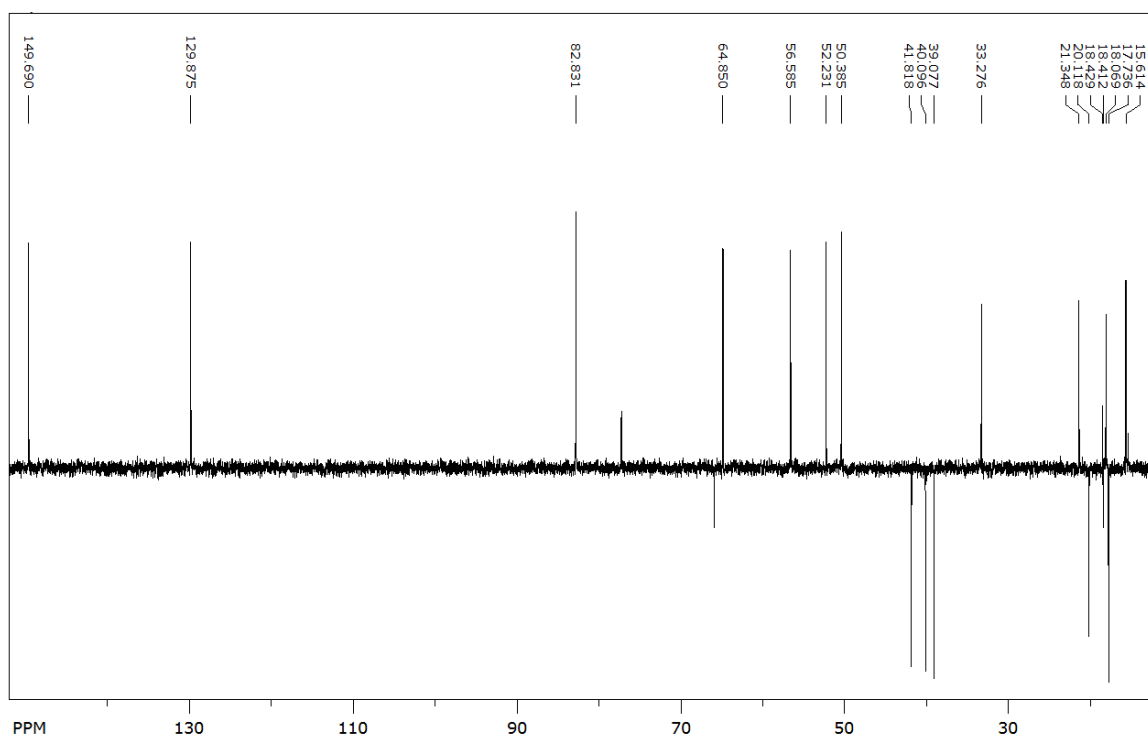

<sup>13</sup>C DEPT spectrum for compound 7 (CDCl<sub>3</sub>, 100.61 MHz).

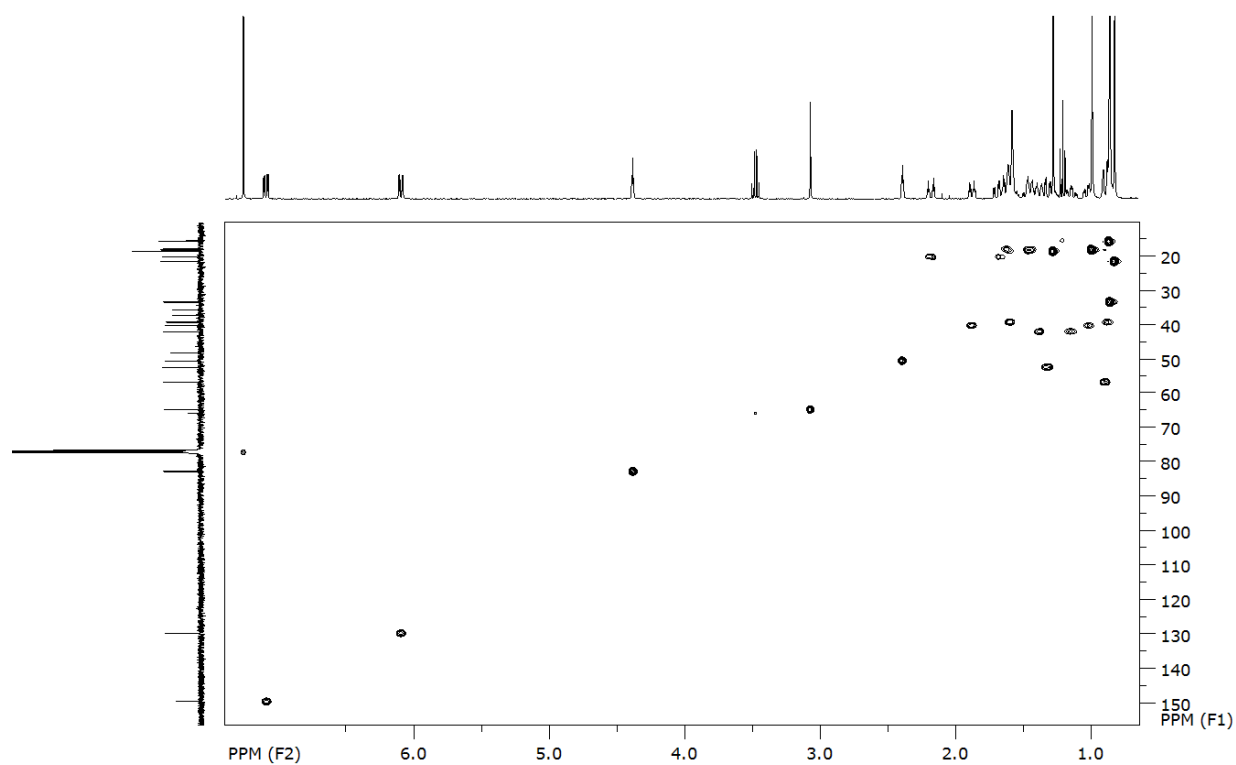

$^1\text{H}$ ,  $^{13}\text{C}$  HSQC spectrum for compound 7.

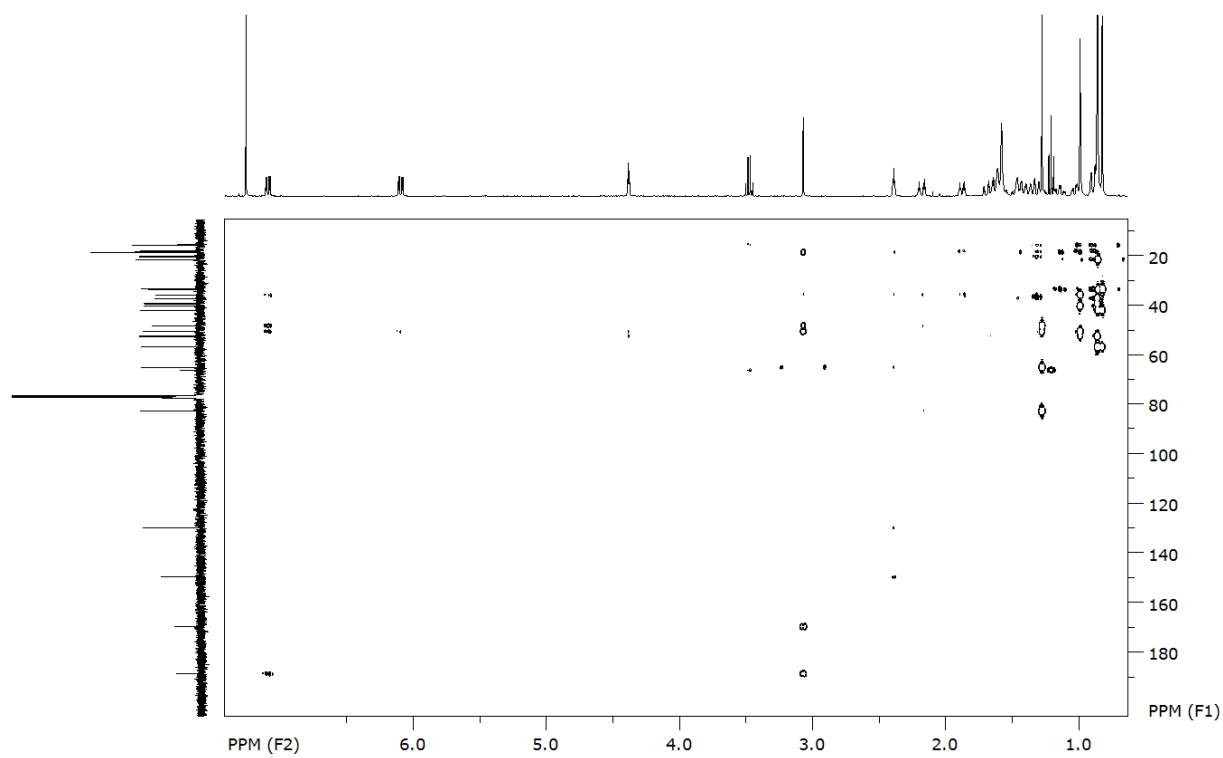

$^1\text{H}$ ,  $^{13}\text{C}$  HMBC spectrum for compound 7.

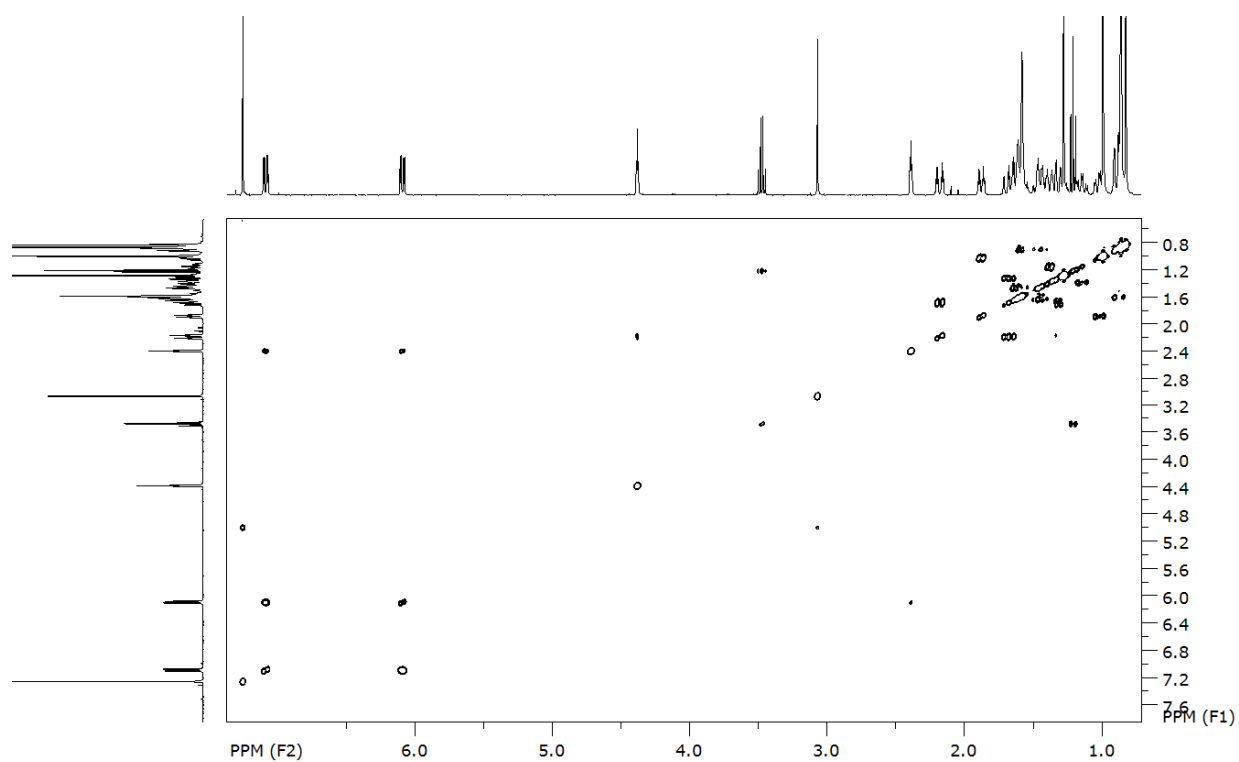

$^1\text{H}$ - $^1\text{H}$  COSY spectrum for compound 7.

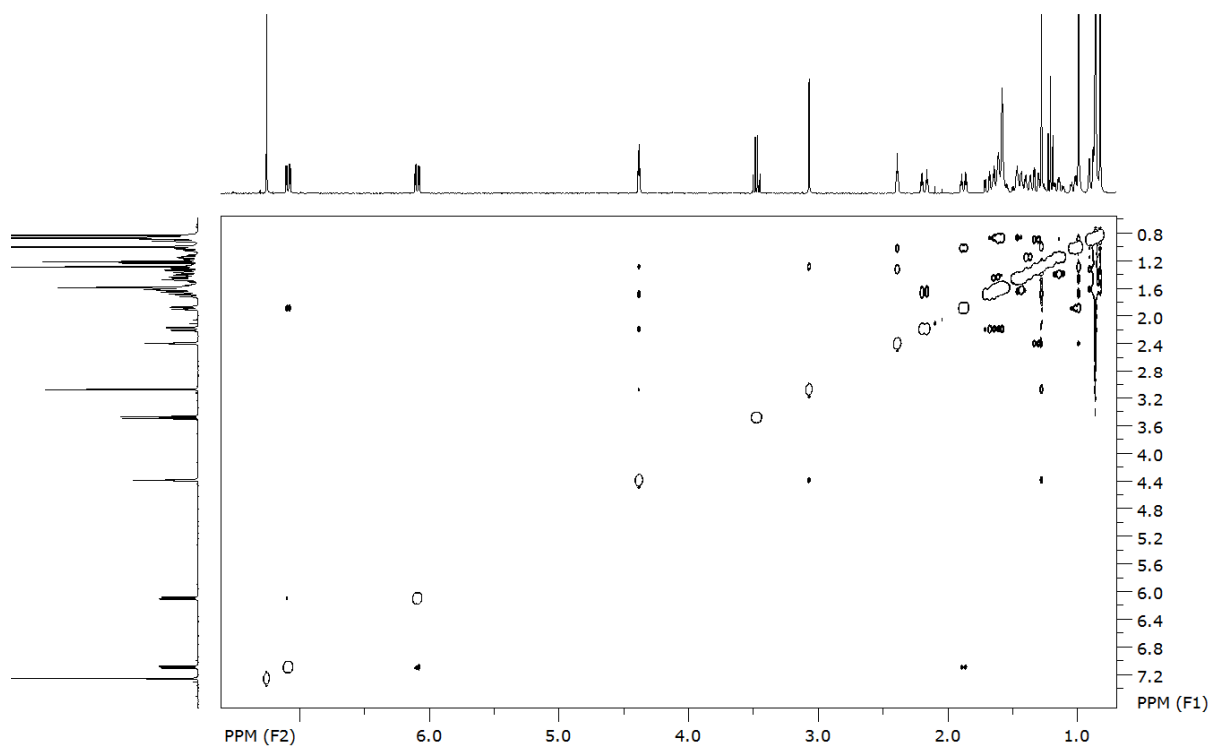

$^1\text{H}$ - $^1\text{H}$  NOESY spectrum for compound 7.

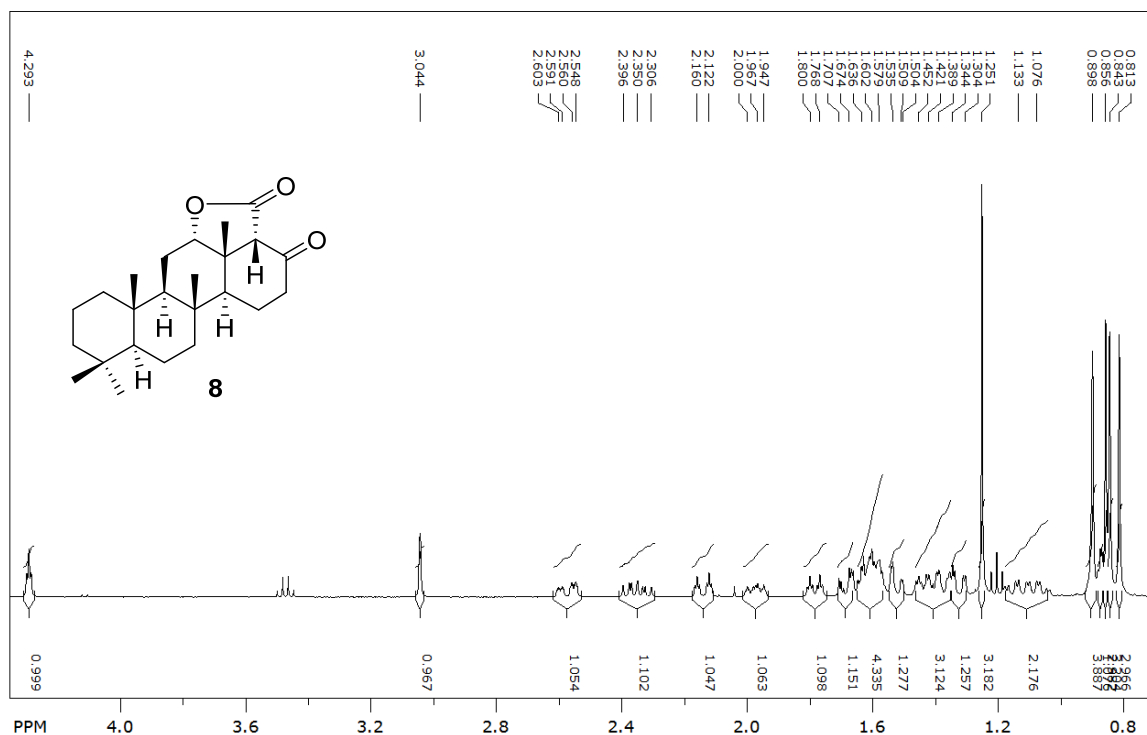

$^1\text{H}$ -NMR spectrum for compound 8 ( $\text{CDCl}_3$ , 400.13 MHz).

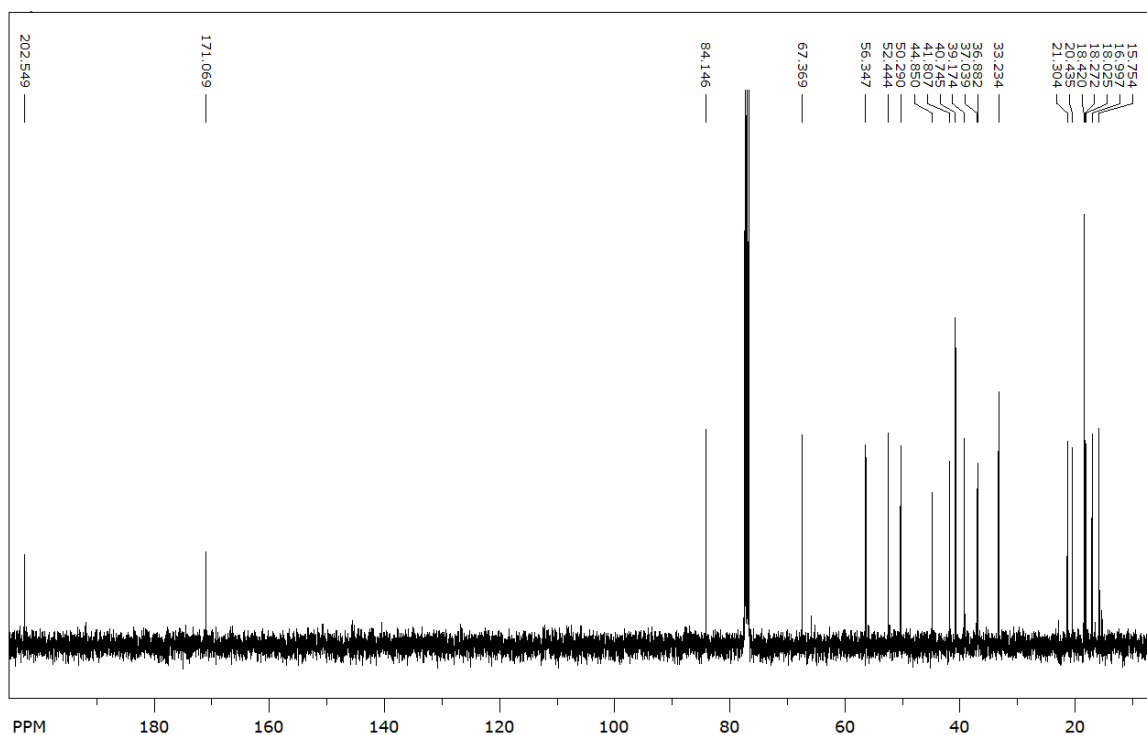

$^{13}\text{C}$ -NMR spectrum for compound 8 ( $\text{CDCl}_3$ , 100.61 MHz).

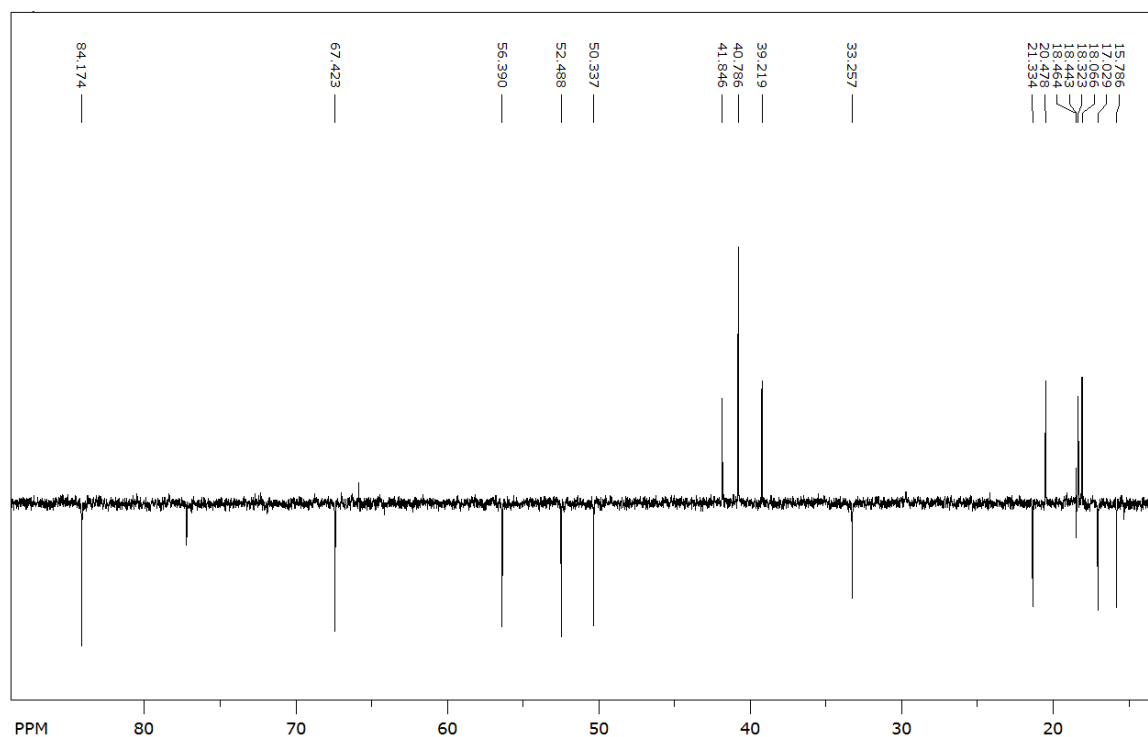

$^{13}\text{C}$  DEPT spectrum for compound **8** ( $\text{CDCl}_3$ , 100.61 MHz).

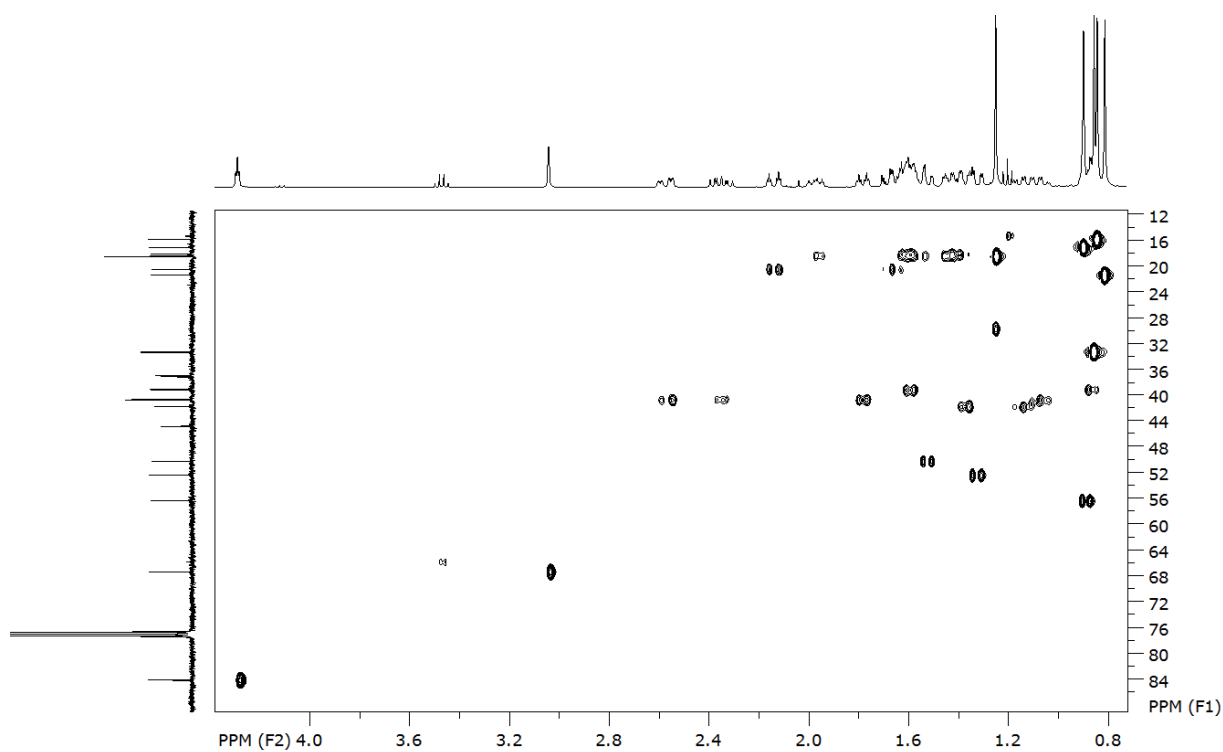

$^1\text{H}$ ,  $^{13}\text{C}$  HSQC spectrum for compound **8**.



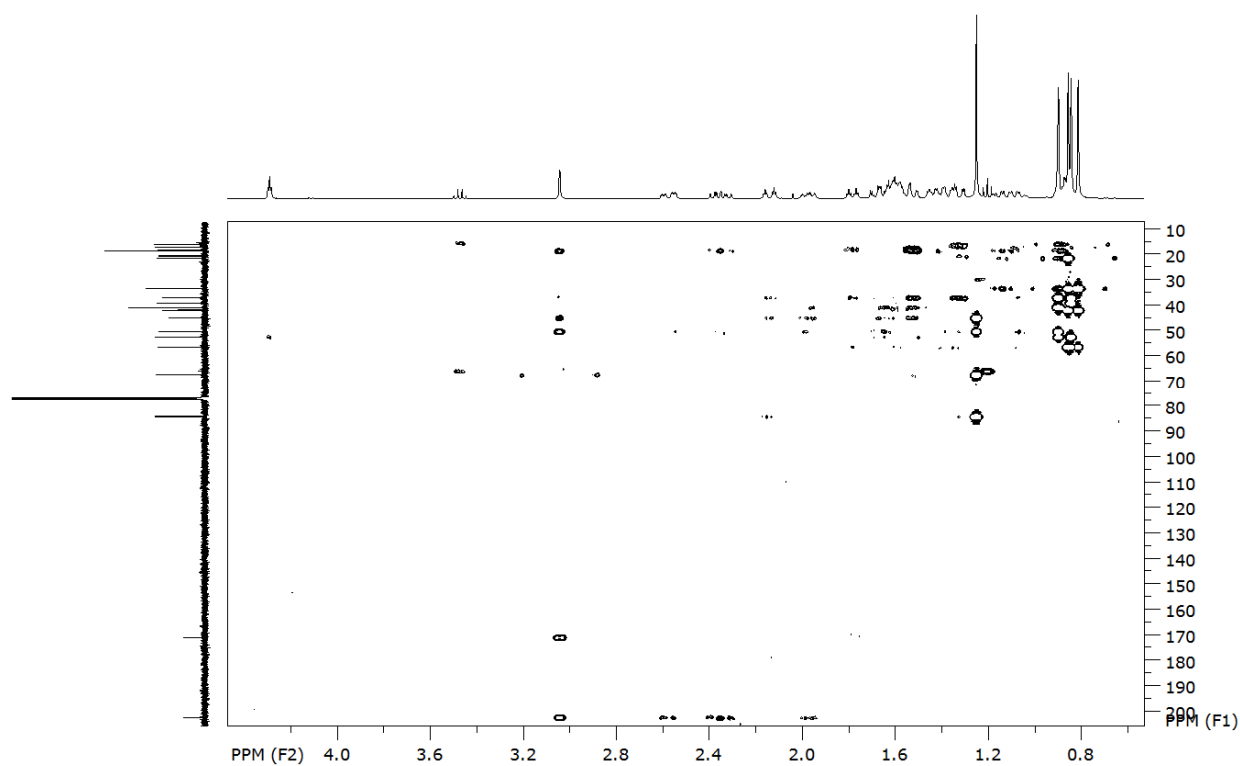

$^1\text{H}$ ,  $^{13}\text{C}$  HMBC spectrum for compound 8.

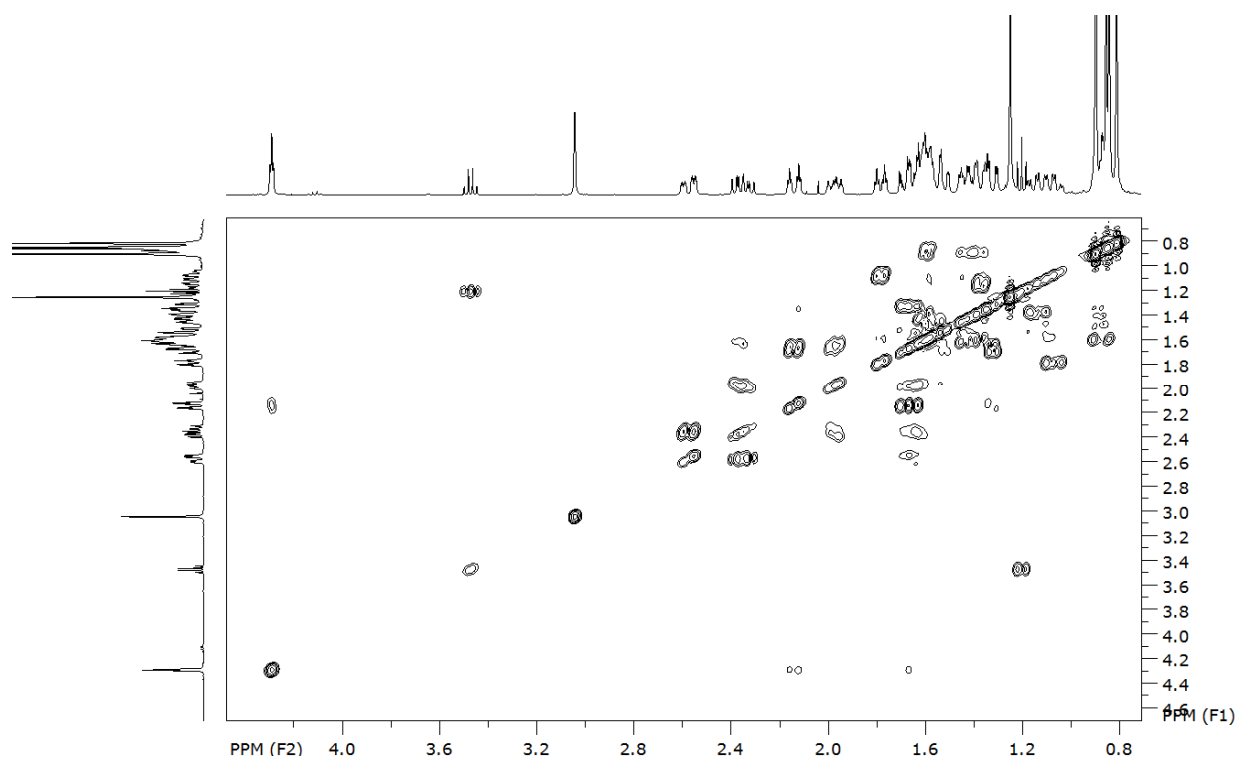

$^1\text{H}$ - $^1\text{H}$  COSY spectrum for compound 8.

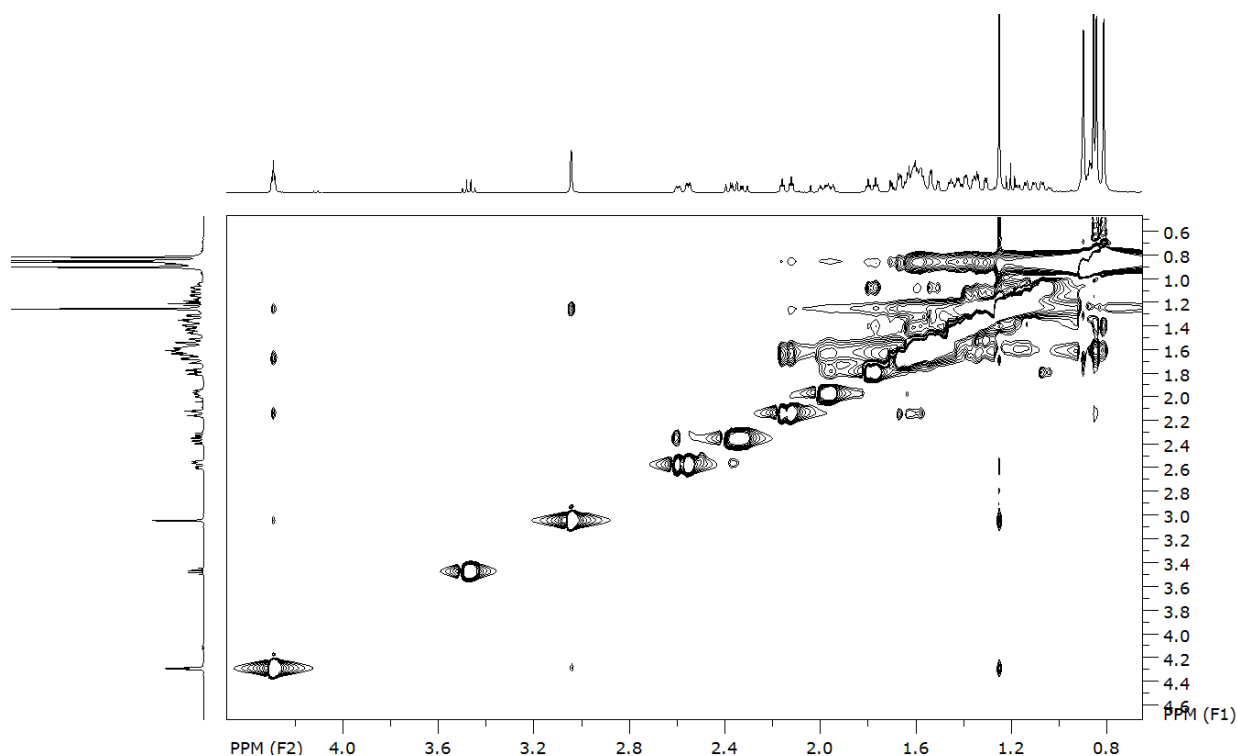

$^1\text{H}$ - $^1\text{H}$  NOESY spectrum for compound **8**.

## REFERENCES

1. CrysAlisPro Software system, version 1.171.38.46, Rigaku Corporation: Oxford, UK, 2015.
2. Dolomanov, O.V.; Bourhis, L.J.; Gildea, R.J.; Howard, J.A.K.; Puschmann, H. OLEX2: a complete structure solution, refinement and analysis program. *J. Appl. Crystallogr.* **2009**, *42*, pp. 339–341. DOI:10.1107/S0021889808042726.
3. Sheldrick, G.M. SHELXT – Integrated space-group and crystalstructure determination. *Acta Crystallogr. Sect. A Foundations and Advances* **2015**, *71* (1), pp. 3–8. DOI: 10.1107/S2053273314026370.
4. Sheldrick, G.M. Crystal structure refinement with SHELXL. *Acta Crystallogr. Sect. C Structural Chemistry* **2015**, *71* (1), pp. 3–8. DOI:10.1107/S2053229614024218.
